1 **Article Summary Line:** Imposing mask usage requirements, group size restrictions, duration  
2 limits, and social distancing policies can have additive, and in some cases multiplicative  
3 protective effects on SARS-CoV-2 infection risk during indoor events.

4 **Running Title:** Indoor SARS-CoV-2 Transmission Interventions

5 **Keywords:** aerosol, airborne, agent-based model, COVID-19, coronavirus, droplet, indoor  
6 transmission, respiratory pathogen, SARS-CoV-2

7  
8 **Title:** Assessing the efficacy of interventions to control indoor SARS-Cov-2 transmission: an  
9 agent-based modeling approach

10 **Authors:** Trevor S. Farthing, and Cristina Lanzas\*

11 **Affiliations:** North Carolina State University, Raleigh, North Carolina, USA (T. Farthing, C.  
12 Lanzas)

13 \*Correspondence to Cristina Lanzas; [clanzas@ncsu.edu](mailto:clanzas@ncsu.edu)

14  
15 **Abstract – 149 words**

16 Intervention strategies for minimizing indoor SARS-CoV-2 transmission are often based on  
17 anecdotal evidence because there is little evidence-based research to support them. We  
18 developed a spatially-explicit agent-based model for simulating indoor respiratory pathogen  
19 transmission, and used it to compare effects of four interventions on reducing individual-level  
20 SARS-CoV-2 transmission risk by simulating a well-known case study. We found that imposing  
21 movement restrictions and efficacious mask usage appear to have the greatest effects on reducing  
22 infection risk, but multiple concurrent interventions are required to minimize the proportion of  
23 susceptible individuals infected. Social distancing had little effect on reducing transmission if

24 individuals move during the gathering. Furthermore, our results suggest that there is potential for  
25 ventilation airflow to expose susceptible people to aerosolized pathogens even if they are  
26 relatively far from infectious individuals. Maximizing rates of aerosol removal is the key to  
27 successful transmission-risk reduction when using ventilation systems as intervention tools.

28

## 29 **Main Text – 3499 words**

### 30 *1. Introduction*

31 Understanding transmission mechanisms is necessary to generate evidence-based guidance  
32 for controlling infectious diseases. Severe Acute Respiratory Syndrome Coronavirus 2 (SARS-  
33 CoV-2), the causative agent of Coronavirus Disease 2019 (COVID-19), is primarily spread  
34 through infectious respiratory droplets and aerosols of varying size (1, 2, 3, 4, 5). These media  
35 are expelled when an individual speaks, coughs, sneezes, or otherwise expectorates (6, 7).  
36 Pathogen transmission can occur when these virion-containing particles are inhaled by, or  
37 otherwise come into contact with the mucosae or conjunctiva (i.e., mouth, nasal membranes, or  
38 eyes) of a susceptible person (5). Aerosol transmission is emerging as an important transmission  
39 pathway, particularly for large clusters associated with superspreading events (2, 8, 9, 10). van  
40 Doremalen et al. (2020) (11) found that SARS-CoV-2 can remain viable in aerosolized droplets  
41 for at least 3 hours post expectoration. While these results may not accurately represent SARS-  
42 CoV-2 stability outside of laboratory conditions (5), their findings are in line with case reports of  
43 viral-RNA detection in air collected from hospital rooms housing COVID-19 patients (12, 13,  
44 14, 15).

45 Transmission of SARS-CoV-2 is more likely in indoor settings than outdoors (8, 9).  
46 Households are the most common venue linked to transmission, but healthcare facilities,

47 religious venues, food processing plants or prisons are also likely to be associated with large  
48 clusters of COVID-19 cases (9). Recommended interventions to reduce indoor transmission  
49 include: social distancing, use of face coverings, increased ventilation, and reduced group sizes  
50 (1). U.S. state government recommendations and restrictions for group size limits in indoor  
51 gatherings range from 10 to 100 people or 10 – 75% of a locale’s original capacity (16). There is  
52 little evidence-based research to support specific group size restrictions, however, and few  
53 studies have sought to identify the most-effective strategy for limiting indoor SARS-CoV-2  
54 transmission.

55 Some mathematical models have been built to support individual-level risk assessment of  
56 indoor transmission and analyze aerosol contributions to past outbreaks. Chande et al. (2020)  
57 (17) created a tool to assess the U.S. county level probability that someone infected with SARS-  
58 CoV-2 will attend events of varied sizes. Their tool is useful for estimating the probability that  
59 SARS-CoV-2 transmission could occur during any gathering, but provides no direct measure of  
60 transmission risk from infectious individuals during events and no way to assess the impact of  
61 intervention strategies other than reducing group sizes. Other models have sought to determine  
62 the role that aerosolized infectious droplets play in indoor SARS transmission relative to larger  
63 droplets that are unlikely to be inhaled, and quantify the transmission risk attributable to aerosols  
64 in varied environments (18, 19, 20, 21, 22). These models are primarily based on Wells-Riley  
65 equations for estimating aerosol-attributable risk, which assume homogenous spatiotemporal  
66 mixing of air constituents and exposure to infectious agents (23). Mathematical indices and  
67 parameter values in these models can be adjusted to simulate effects of intervention strategies  
68 like social distancing (22) and increased ventilation rates (18, 20, 21, 22), but are insufficient for  
69 capturing or accounting for any behavior- or environment-mediated spatiotemporal heterogeneity

70 in transmission risk. Shao et al. (2021) (24) used a fluid dynamics model to simulate ventilation  
71 effects on SARS-CoV-2 transmission while allowing for heterogenous droplet movement  
72 behaviors. Their findings highlight the need to account for within-room spatial heterogeneity  
73 when studying indoor transmission risk, as phenomena like ventilation can increase infection risk  
74 to individuals in one area of a room or building while simultaneously mitigating risk in another.

75 Here, we present a spatially-explicit agent-based model (ABM) for simulating within-room  
76 respiratory pathogen transmission to inform policy-making decisions aiming to mitigate indoor  
77 transmission and implementing individual-level interventions. By simulating spatiotemporal  
78 droplet dynamics (e.g., emission of varying droplet size and subsequent distribution in the  
79 environment) as well as allowing for dynamic movement and positioning of infectious and  
80 susceptible individuals, our model allows virion exposure rates to vary within indoor settings.  
81 We use our model to estimate effects of proposed COVID-19 intervention strategies for indoor  
82 environments (i.e., increased airflow, limiting contact durations, wearing masks, and increased  
83 interpersonal spacing). For benchmarking purposes, we simulate the outbreak that took place  
84 during a choir practice in Skagit County, WA in March 2020 (2). Additionally, we further  
85 investigate potential drivers of superspreading events, like the Skagit County example, by  
86 characterizing and comparing how different aspects of indoor gatherings (i.e., population  
87 density, duration, quanta production by infectious individuals, and ventilation effects) impact  
88 transmission risk. Through these analyses we provide guidance for minimizing SARS-CoV-2  
89 transmission during indoor gatherings.

## 90 *2. Methods*

### 91 *2.1 Model Description*

92 We developed a spatially-explicit, stochastic ABM to simulate both direct-droplet and  
93 airborne respiratory pathogen transmission in indoor settings. This model was created and  
94 executed using the open-source modeling software, NetLogo (Ver. 6. 1. 1) (25) and is available  
95 for download at <https://github.com/lanzaslab/droplet-ABM>. In Appendix S1 we provide a  
96 detailed description of our model in accordance with ODD (Overview, Design concepts, Details)  
97 standards outlined by (26). We present a limited summary of the model design below. When  
98 describing infectious media in our model, we use the term “droplet” to refer to respiratory  
99 droplets of any size.

100 Agents in our model represent people congregating in a fixed space (e.g., students in a  
101 classroom, diners in a restaurant, etc.). Patches (i.e., grid cells in the NetLogo model interface)  
102 represent  $1 \times 1 \text{ m}^2$  areas, and the spatial extent can range from 1 to  $\infty \text{ m}^2$ . The model time step is  
103 1 minute. Droplets ranging from 3 to  $750 \mu\text{m}$  in diameter are expelled by infectious agents.  
104 Subsequently, droplets can be inhaled, fall out, diffuse to nearby patches, move via directed  
105 airflow, and decay at fixed rates over the course of a simulation. Infection in our model is driven  
106 by exposure to virions contained in these droplets, and the number of virions per droplet scales  
107 with droplet size. The rate at which droplets fall out (i.e., are removed from circulating air flows)  
108 of the simulation is based on the calculated terminal velocity falling speed for droplets, and  
109 therefore varies with droplet size. Droplet sizes incapable of settling on the ground within one  
110 minute are allowed to move between patches via ventilation- and diffusion-induced airflow.  
111 Thus, risk of exposure and subsequent infection for susceptible individuals varies by space and  
112 time during the simulation (Figure 1). We recognize that the ability of forced air ventilation  
113 systems to reduce local respiratory pathogen transmission is linked to their ability to move  
114 aerosolized droplets away from susceptible individuals in three dimensions (18, 24). Though this

115 effect is not explicitly tied to airflow inputs in our model, which only allows airflow in two  
116 dimensions, we can effectively simulate ventilation-induced aerosolized droplet movement to  
117 heights outside of individuals' inhalation ranges by increasing the decay rate when ventilation  
118 effects are simulated. In addition to controlling the number of individuals present and the size of  
119 the simulated world, users can dictate infectiousness parameters and other scenario-specific  
120 variable values (e.g., number of infectious individuals, probability that infectious individuals are  
121 asymptomatic, cough frequency, number virions per mL of droplet fluid, risk of infection given  
122 exposure to 1 virion, etc.), ventilation parameters (e.g., direction and speed of airflow, droplet  
123 filtration probability, etc.), and adherence to transmission-risk-reduction guidelines (e.g., mask  
124 usage, local social distancing, etc.).

## 125 *2.2 Testing SARS-CoV-2 transmission reduction strategies*

### 126 *2.2.1 Case scenario and model inputs*

127 In March 2020, there was a probable SARS-CoV-2 superspreading event during a choir  
128 practice taking place at a church in Skagit County, Washington, USA (2). Sixty-one people were  
129 in attendance, one attendee was experiencing flu-like symptoms at the time and later tested  
130 positive for COVID-19 (2). This individual likely infected 53 other attendees over the course of  
131 the event (2). We briefly describe our rationale for setting scenario-specific input values to  
132 simulate this case in our model below, but more-detailed explanations for input and parameter  
133 values are given in Appendix S2, and Appendix S3 describes how sensitive simulated infection  
134 risk is to variations in select model parameters.

135 We know from (2) that the choir practice lasted 150 minutes in total, split into 4 distinct time  
136 intervals. In our simulations, we decided to rearrange agents in our model after 40, 90, and 105  
137 minutes to recreate mixing associated with changing time intervals. At timestep 105, individuals

138 moved back to their initial placements, representing their adherence to assigned seating during  
139 interval 4 (i.e., minutes 105 – 150). The seating chart has not been shared due to privacy  
140 concerns (21) however, we can assume that a maximum of 2 people could be within 1-m<sup>2</sup>  
141 patches in this scenario. We set the inhalation rate for simulated individuals to 0.023 m<sup>3</sup> air/min,  
142 a rate consistent with adults participating in light activity (27). Because it is uncertain whether or  
143 not the forced-air system was turned on during the choir practice (21), we decided to run our  
144 simulations in two sets: ventilation-on (i.e., both forced-air effects and natural diffusion moved  
145 droplets between patches) and ventilation-off (i.e., only natural diffusion moved droplets  
146 between patches).

147 In addition to model the baseline scenario, we modulated values of model inputs related to  
148 group-level risk-reduction strategies (i.e., limited population, limited contact durations, mask  
149 usage, and meter-level social distancing) between simulations in order to assess the efficacy of  
150 each strategy on reducing the number of susceptible individuals infected. Regarding mask usage,  
151 we assumed face coverings have both source-prevention and wearer-protection effects, and  
152 reduced global droplet exposure/exhalation rates by 0%, 25%, 50%, 75% and 90%. The upper  
153 range here is intended to simulate the use of N95 and simple surgical masks, which are estimated  
154 to reduce aerosol emission rates by approximately 90% and 74%, respectively (28, 29). Lower  
155 values are intended to simulate the use of single- and multi-layered fabric masks, for which a  
156 wide range of aerosol-filtration efficacies have been reported (30). When simulating mask usage,  
157 we assumed that all individuals were wearing masks and that all masks had the same efficacy.  
158 Table 1 outlines the model input values for our superspreading-scenario simulations.

159 *2.2.2 Running simulations and analyses*

160 We set up a factorial simulation run within the NetLogo BehaviorSpace using our specified  
161 input levels. We ran 1000 replicates of all input set combinations, ultimately resulting in  
162 1,080,000 simulations. Simulations were aggregated into a single data set prior to analysis.

163 We used a beta regression model with a fixed unknown precision parameter,  $\phi$ , (31) to  
164 estimate effects of interventions on the mean proportion of susceptible individuals infected in our  
165 full simulation set,  $\mu$ . Beta regression models are employed to analyze proportion data (31, 32).  
166 We chose to use this method because the potential number of infected individuals in each  
167 simulation was limited by the simulated group size, which was a predictor variable of interest,  
168 and because preliminary analysis suggested that fitting our data to a beta distribution better  
169 explained observed variation than other regression models. We therefore determined it was more  
170 appropriate to evaluate effect sizes in terms of the relative proportion of susceptible people  
171 infected rather than their total number. We fit our data to the model:

$$\begin{aligned} 172 \ln\left(\frac{\mu}{1-\mu}\right) = & \beta_0 + \beta_1(\text{Gathering duration}) + \beta_2(\text{Mask use}) + \beta_3(\text{Mask efficacy}) \\ 173 & + \beta_4(\text{Group size}) + \beta_5(\text{Social distancing}) + \beta_6(\text{Ventilation}) + \beta_7(\text{Movement}) \\ 174 & + \beta_8(\text{Mask use} * \text{Group size}) + \beta_9(\text{Mask use} * \text{Social distancing}) \\ 175 & + \beta_{10}(\text{Group size} * \text{Social distancing}) \\ 176 & + \beta_{11}(\text{Mask use} * \text{Group size} * \text{Social distancing}), \end{aligned}$$

177 where “Gathering duration,” “Mask efficacy,” and “Group size” are intervention-strategy  
178 variables relating to: minutes of simulated interaction between individuals, the efficacy of worn  
179 face masks for reducing expectoration and inhalation of infectious droplets, the simulated  
180 population size, and attempted meter-level social distancing in each realized simulation,  
181 respectively. The variables “Mask use,” “Movement,” and “Ventilation” are known confounders  
182 related to: reduced droplet spread distance from expectorating infectious individuals wearing



183 masks, the number of times individuals were rearranged within simulations to reflect mixing of  
184 event attendees, and movement of infectious aerosols throughout the simulated space due to a  
185 forced-air ventilation system, respectively. “Mask use” is a binary variable taking the value of 1  
186 when simulated individuals are masked (i.e., “Mask efficacy” > 0), and 0 when they are not.  
187 “Movement” takes any one value within the range of 1-to-4, dependent on “Gathering duration.”  
188 “Ventilation” is a binary variable taking the value of 1 for simulations in the “ventilation-on”  
189 subset, and 0 for those in the “ventilation-off” subset.

190 Because beta regression procedures assume all dependent variable values fall between 0 and  
191 1, we used the data transformation procedure described by (33) to reconstruct our proportion data  
192 without these extremities. All analysis and plotting was carried out using functions from the  
193 “betareg” R package (32) in RStudio (v. 1.1.463) (34) running R (v. 3.6.2) (35). We calculated a  
194 pseudo- $R^2$  (31) to assess goodness of fit for our regression model

### 195 *2.3 Evaluating drivers of transmission in indoor gatherings*

196 To assess the relative contribution of environmental conditions to SARS-CoV-2 transmission  
197 risk, we conducted a sensitivity analysis to ascertain relative effects of population density,  
198 gathering duration, quanta production by infectious individuals, and ventilation on SARS-CoV-2  
199 infection risk beyond the conditions tested in the Skagit County case. In addition, we quantified  
200 the ability of different ventilation system aspects (i.e., air-change rate, filtration rate, and  
201 effective three-dimensional droplet removal rate) to reduce SARS-CoV-2 transmission risk.

202 Table 2 describes the model input values for these indoor-gathering-risk-assessment simulations.

203 We set up a factorial simulation run within the NetLogo BehaviorSpace using our specified  
204 input levels. We ran 1000 replicates of each parameter set combination when the “Forced air”  
205 parameter was set to “on” and when it was “off.” We ran these sets separately in order to save

206 computation time as there were many inputs that only changed when forced airflow was  
207 simulated. Ultimately, we produced 144,000 “off” simulations, and 20,160,000 “on” simulations.  
208 In both sets, we identified simulations when transmission occurred (i.e., simulations where  $\geq 1$   
209 person was infected), and recorded this occurrence as the binary variable  $y_i$  so that

$$210 \quad y_i = \begin{cases} 1 & \text{if transmission was observed} \\ 0 & \text{if no transmission occurred,} \end{cases}$$

211 for each realized simulation,  $i$ .

212 We aggregated simulation data into a single data set and carried out a logistic regression  
213 analysis to estimate effects of variable inputs on observed differences in the probability of  
214 observing  $\geq 1$  infections. We fit our data to the model:

$$215 \quad \ln\left(\frac{\Pr(y_i = 1)}{\Pr(y_i = 0)}\right) = \beta_0 + \beta_1(\text{Population density}) + \beta_2(\text{Gathering duration}) + \\ 216 \quad \beta_3(\text{Quanta per hour}) + \beta_4(\text{Excess droplet removal rate}) + \beta_5(\text{Air change rate}) + \\ 217 \quad \beta_6(\text{Air filtration rate}),$$

218 where “Population density” is given by  $\frac{n}{m^2}$ , and the “Excess droplet removal rate” (%/min)  
219 represents the increased removal of aerosols due to ventilation-induced 3-dimensional droplet  
220 movement. It is given by the equation: (Virion decay rate – 1.05). The 1.05 here represents the  
221 general SARS-CoV-2 decay rate (i.e., 1.05%/min) as reported by (11). Subtracting this baseline  
222 value from the simulated Virion decay rate gives us an excess removal rate that we use as a  
223 proxy for 3-dimensional droplet removal attributable to forced airflow movement. When no  
224 forced airflow is simulated, excess droplet removal, air change, and filtration rates all equal 0.  
225 We calculated the Tjur (36) pseudo- $R^2$  for our logistic regression model to assess goodness of fit.

226 *3. Results & Discussion*

227 We presented a stochastic ABM for studying indoor individual-level respiratory pathogen  
228 transmission, and used it to demonstrate the potential effectiveness of multiple intervention  
229 strategies for reducing SARS-CoV-2 transmission in an indoor group setting mimicking that of a  
230 known superspreading event. We were able to effectively recreate the empirical proportion of  
231 susceptible individuals likely infected during the Skagit County superspreading event by  
232 simulating the gathering without implementing any intervention strategies (Figure 2).

233 Our beta regression model for estimating intervention efficacy had a pseudo- $R^2$  of  $\approx 0.43$ .  
234 Given the number of stochastic processes in our ABM, the explanatory power of the model is  
235 acceptable. Duration limits and efficacious mask usage appear to have the greatest effects on  
236 reducing the proportion of susceptible individuals infected, but multiple concurrent interventions  
237 are required to minimize the proportion of susceptible individuals infected (Table 3, Figure 3).  
238 However, it is important to note that observed proportional differences are more meaningful for  
239 relatively large groups than for smaller ones. The effectiveness of limiting the duration of  
240 gatherings for reducing the proportion of infected individuals appears to largely result from  
241 reducing the confounding movement effect that increases over time, thereby reducing the  
242 probability that susceptible individuals will move from uncontaminated space to areas with  
243 greater concentrations of infectious aerosols or nearby to infectious individuals where they may  
244 be exposed to large virion-containing droplets (Table 3). We show that simply by limiting the  
245 time spent rehearsing that night to 40 min, reducing random mixing between attendees by ending  
246 the event prior to splitting into disparate groups (2), the proportion of people infected could have  
247 been reduced by 70 – 88% even without implementing any other intervention strategies.  
248 Therefore, imposing movement restrictions could be a more effective intervention than strict  
249 duration limits.

250 We found that mask usage and social distancing interventions are relatively more effective  
251 for reducing proportional infection rates in small groups than in large ones. Our findings suggest  
252 that in the Skagit County choral case, duration limits with implied movement restrictions and  
253 mask usage would have been the most-effective intervention strategies for reducing SARS-CoV-  
254 2 infection rates, but multiple interventions would have needed to be deployed simultaneously to  
255 reach near-zero rates (i.e., mean rate  $< 0.5$  people / gathering duration). Infection rates generally  
256 increased with group size and decreased with mask efficacy, and we found that when movement  
257 rates were minimized (i.e., gathering durations  $\leq 40$ ) we could minimize infection rates with  
258 relatively-low mask efficacy or even no mask usage in some cases. Our results support recent  
259 evidence suggesting that even wearing masks with relatively low droplet-filtering abilities  
260 around others can help to reduce exposure to infectious agents (30, 37). Attempted social  
261 distancing up to 3 m had little effect on transmission rates relative to other intervention  
262 strategies. That said, because social distancing generally had a greater effect on proportional  
263 infection rates when group size was limited to 10 people, and 2-m social distances reduced the  
264 mean number of infections in larger groups, we can intuit that the relatively small overall effect  
265 of social distancing was likely due to the presence of physical barriers (e.g., edges of the  
266 simulated world) or the physical arrangement of nearby individuals impeding agents' attempts to  
267 social distance, rather than due to far-reaching droplet spread that makes social distancing  
268 irrelevant.

269 Conclusions regarding social distancing effects are further supported by our logistic  
270 regression model results that describe the relative effects of population density, gathering  
271 duration, quanta production, and ventilation on the probability of indoor SARS-CoV-2  
272 transmission from a single infectious individual (Table 4). This model had a pseudo- $R^2$  value of

273 0.25 and demonstrated that among the considered variables, population density was the most-  
274 important contributor to SARS-CoV-2 transmission risk. Additionally, increases in gathering  
275 duration, infectious aerosol production, and horizontal air movement all escalate the probability  
276 that transmission will occur during gatherings, though the effect is much lesser than that of  
277 increasing population density. The relatively small effects of quanta production and duration on  
278 transmission risk suggest that once individuals are exposed to infectious agents, they are likely to  
279 become infected quickly. Thus, minimizing susceptible people's exposure to infectious media is  
280 of paramount importance for controlling COVID-19 incidence.

281       Regarding observed effects of ventilation in our beta and logistic regression models, our  
282 results suggest that in spite of some evidence that forced-air ventilation systems can reduce risk  
283 of respiratory pathogen infection from indoor aerosols (38, 39), there is potential for forced  
284 airflow to expose susceptible people to aerosolized pathogens even if they are relatively far from  
285 infectious individuals, and therefore increase transmission risk. We show that, though filtering  
286 re-circulated air can lower transmission risk (Table 4), increasing this effect is unlikely to  
287 compensate for the elevated risk attributable to increased horizontal air-change rates (Tables 3 &  
288 4). It appears that maximizing rates of three-dimensional aerosol removal is the key to successful  
289 transmission-risk reduction when using forced-air ventilation systems as intervention tools. Our  
290 results are therefore consistent with the findings of (18), who advise that “displacement”  
291 ventilation systems, those designed to vertically stratify indoor air by temperature and remove  
292 warmer air, are likely able to reduce local SARS-CoV-2 transmission risk. “Mixing” ventilation  
293 systems, designed to distribute temperature and aerosols equally throughout the space, are likely  
294 insufficient for preventing transmission and may even facilitate it (18).

295        Given our findings, we maintain that in areas where COVID-19 prevalence remains high,  
296 holding events associated with relatively-increased mixing rates between individuals (e.g., social  
297 gatherings, sporting events, etc.) should be avoided even if attendance rates are presumed to be  
298 low. Such events are likely to be associated with SARS-CoV-2 transmission if  $\geq 1$  infectious  
299 individual(s) were to attend, the probability of which increases linearly with group size (17). It is  
300 important to note however, that though our results provide insight into mechanisms for reducing  
301 SARS-COV-2 transmission rates, given the effect that model parameters can have on simulation  
302 outcomes (*see* Appendix S3), our findings may not be reasonably extrapolated to accurately  
303 predict transmission in scenarios dissimilar from those we modeled here (e.g.,  $\geq 2$  infectious  
304 individuals, fewer aerosolized virions produced during expectorations, etc.). Regardless, we can  
305 still conclude that imposing mask usage requirements, group size restrictions, duration limits,  
306 and social distancing policies have additive, and in some cases multiplicative protective effects  
307 on individual-level SARS-CoV-2 infection risk during gatherings, and can be particularly  
308 efficacious interventions when deployed simultaneously.

### 309 **Acknowledgments**

310 This work was partially supported by CDC U01CK000587-01M001 and R35GM134934.

### 311 **Author Bio**

312        Trevor S. Farthing is a PhD candidate in the Comparative Biomedical Sciences program at  
313 North Carolina State University. His work combines ecological and epidemiological analyses  
314 with agent-based infectious disease modeling to quantify and compare driving forces of pathogen  
315 transmission in varied pathogen-host systems.

316        Dr. Cristina Lanzas is an Associate Professor of Infectious Disease at North Carolina State  
317 University. Her research focuses on the epidemiology and ecology of infectious diseases in

318 animal and human populations. Her work combines data science, epidemiological analysis and  
319 mathematical models to study transmission mechanisms, and to identify and design effective  
320 control measures to reduce the public health burden associated with infectious diseases.

## 321 **References**

- 322 1. United States Center for Disease Control and Prevention [CDC]. (2020) Scientific brief:  
323 SARS-CoV-2 and potential airborne transmission. 2020 [cited 2021 Jan 21].  
324 <https://www.cdc.gov/coronavirus/2019-ncov/more/scientific-brief-sars-cov-2.html>.
- 325 2. Hamner L, Dubbel P, Capron I, Ross A, Jordan A, Lee J, et al. High SARS-CoV-2 attack rate  
326 following exposure at a choir practice – Skagit County, Washington, March 2020. *Morb*  
327 *Mortal Wkly Rep.* 2020; 69:606-610. doi: 10.15585/mmwr.mm6919e6.
- 328 3. Lu J, Gu J, Li K, Xu C, Su W, Lai Z, et al. COVID-19 outbreak associated with air  
329 conditioning in restaurant, Guangzhou, China, 2020. *Emerg Infect Dis.* 2020; 26(7):1628-  
330 1631. doi: 10.3201/eid2607.200764.
- 331 4. Shen Y, Dong H, Wang Z, Martinez L, Sun Z, Handel A, et al. Community outbreak  
332 investigation of SARS-CoV-2 transmission among bus riders in eastern China. *JAMA Intern*  
333 *Med.* 2020; 180(12):1665-1671. doi: 10.1001/jamainternmed.2020.5225.
- 334 5. World Health Organization [WHO]. Modes of transmission of virus causing COVID-19:  
335 implications for IPC precaution recommendations. 2020 [cited 2021 Jan 21].  
336 [https://www.who.int/news-room/commentaries/detail/modes-of-transmission-of-virus-](https://www.who.int/news-room/commentaries/detail/modes-of-transmission-of-virus-causing-covid-19-implications-for-ipc-precaution-recommendations)  
337 [causing-covid-19-implications-for-ipc-precaution-recommendations.](https://www.who.int/news-room/commentaries/detail/modes-of-transmission-of-virus-causing-covid-19-implications-for-ipc-precaution-recommendations)
- 338 6. Atkinson J, Chartier Y, Pessoa-Silva CL, Jensen P, Li Y, Seto W-H. Natural Ventilation for  
339 Infection Control in Health-Care Settings. World Health Organization: Geneva, Switzerland.  
340 2009 [cited 2021 Jan 21].

- 341 [https://apps.who.int/iris/bitstream/handle/10665/44167/9789241547857\\_eng.pdf;jsessionid=](https://apps.who.int/iris/bitstream/handle/10665/44167/9789241547857_eng.pdf;jsessionid=1A17F4B41AC402C2746778937A854E27?sequence=1)  
342 [1A17F4B41AC402C2746778937A854E27?sequence=1.](https://apps.who.int/iris/bitstream/handle/10665/44167/9789241547857_eng.pdf;jsessionid=1A17F4B41AC402C2746778937A854E27?sequence=1)
- 343 7. Stadnytskyi V, Bax CE, Bax A, Anfinrud P. The airborne lifetime of small speech droplets  
344 and their potential importance to SARS-CoV-2 transmission. PNAS. 2020; 117(22):11875-  
345 11877. doi: 10.1073/pnas.2006874117.
- 346 8. Qian H, Miao T, Liu L, Zheng X, Luo D, Li Y. Indoor transmission of SARS-CoV-2. Indoor  
347 Air. 2020;00:1-7. doi: 10.1111/ina.12766.
- 348 9. Leclerc QJ, Fuller NM, Knight LE, Funk S, Knight GM. What settings have been linked to  
349 SARS-CoV-2 transmission clusters? Wellcome Open Res. 2020;5:83. doi:  
350 10.12688/wellcomeopenres.15889.2.
- 351 10. Park S, Kim Y, Yi S, Lee S, Na B, Kim C, et al. Coronavirus disease outbreak in call center,  
352 South Korea. Emerg Infect Dis. 2020;26(8):1666-1670. doi: 10.3201/eid2608.201274.
- 353 11. van Doremalen N, Bushmaker T, Morris DH, Holbrook MG, Williamson BN, Tamin A, et al.  
354 Aerosol and surface stability of SARS-CoV-2 as compared with SARS-CoV-1. N Engl J  
355 Med. 2020;2020(382):1564-1567. doi: 10.1056/NEJMc2004973.
- 356 12. Chia PY, Coleman KK, Tan YK, Ong SWX, Gum M, Lau SK, et al. Detection of air and  
357 surface contamination by SARS-CoV-2 in hospital rooms of infected patients. Nat Comm.  
358 2020;11:2800. doi: 10.1038/s41467-020-16670-2.
- 359 13. Guo Z-D, Wang Z-Y, Zhang S-F, Li X, Li L, Li C, et al. Aerosol and surface distribution of  
360 severe acute respiratory syndrome coronavirus 2 in hospital wards, Wuhan, China, 2020.  
361 Emerg Infect Dis. 2020;26(7):1583-1591. doi: 10.3201/eid2607.200885.



- 362 14. Santarpia JL, Rivera DN, Herrera V, Morwitzer NJ, Creager H, Santarpia GW, et al.  
363 Transmission potential of SARS-CoV-2 in viral shedding observed at the University of  
364 Nebraska Medical Center. 2020. Preprint at doi: 10.1101/2020.03.23.20039446.
- 365 15. Orenes-Piñero E, Baño F, Navas-Carrillo D, Moreno-Docón A, Marín M, Misiego R, et al.  
366 Evidences of SARS-CoV-2 virus air transmission indoors using several untouched surfaces.  
367 Sci Tot Environ. 2020;751:142317. doi: 10.1016/j.scitotenv.2020.142317.
- 368 16. MultiState. COVID-19 State and Local Policy Dashboard.  
369 <https://www.multistate.us/research/covid/public>. 2009 [cited 2021 Jan 21].
- 370 17. Chande A, Lee S, Harris M, Nguyen Q, Beckett SJ, Hilley T, et al. Real-time, interactive  
371 website for US-county-level COVID-19 event risk assessment. Nat Hum Behav.  
372 2020;4:1313-1319. doi: 10.1038/s41562-020-01000-9.
- 373 18. Bhagat RK, Davies Wykes MS, Dalziel SB, Linden PF. Effects of ventilation on the indoor  
374 spread of COVID-19. J Fluid Dynam. 2020;903:F1. doi: 10.1017/jfm.2020.720.
- 375 19. Chen W, Zhang N, Wei J, Yen H, Li Y. Short-range airborne route dominates exposure of  
376 respiratory infection during close contact. Build & Environ. 2020;176:106859. doi:  
377 10.1016/j.buildenv.2020.106859.
- 378 20. Lelieveld J, Helleis F, Borrmann S, Cheng Y, Drewnick F, Haug G, et al. Model calculations  
379 of aerosol transmission and infection risk of COVID-19 in indoor environments. Int J  
380 Environ Res Pub Health. 2020;17:8114. doi: 10.3390/ijerph17218114.
- 381 21. Miller SL, Nazaroff WW, Jimenez JL, Boerstra A, Buonanno G, Dancer SJ, et al.  
382 Transmission of SARS-CoV-2 by inhalation of respiratory aerosol in the Skagit Valley  
383 Chorale superspreading event. Indoor Air. 2020;00:1-10. doi: 10.1111/ina.12751.

- 384 22. Sun C, Zhai Z. The efficacy of social distance and ventilation effectiveness in preventing  
385 COVID-19 transmission. *Sust Cities Soc.* 2020;62:102390. doi: 10.1016/j.scs.2020.102390.
- 386 23. Riley EC, Murphy G, Riley RL. Airborne spread of measles in a suburban elementary school.  
387 *Am J Epidemiol.* 1978;107(5):421-432. doi: 10.1093/oxfordjournals.aje.a112560.
- 388 24. Shao S, Zhou D, He R, Li J, Zou S, Mallery K, et al. Risk assessment of airborne  
389 transmission of COVID-19 by asymptomatic individuals under different practical settings. *J*  
390 *Aerosol Sci.* 2021;151:105661. doi: 10.1016/j.jaerosci.2020.105661.
- 391 25. Wilensky U. NetLogo. Center for Connected Learning and Computer-Based Modeling,  
392 Northwestern University, Evanston, IL. <http://ccl.northwestern.edu/netlogo/>. 1999 [cited  
393 2021 Jan 21].
- 394 26. Grimm V, Railsback SF, Vincenot CE, Berger U, Gallagher C, DeAngelis DL, et al. The  
395 ODD protocol for describing agent-based and other simulation models: a second update to  
396 improve clarity, replication, and structural realism. *J Artif Soc Soc Simul.* 2020;23(2):7. doi:  
397 10.18564/jasss.4259.
- 398 27. Adams WC. Measurement of breathing rate and volume in routinely performed daily  
399 activities. 1993. Final Report, Contract No. A033-205. California Air Resources Board,  
400 Sacramento, CA, USA.  
401 <https://ww2.arb.ca.gov/sites/default/files/classic/research/apr/past/a033-205.pdf>.
- 402 28. Jefferson T, Foxlee R, Del Mar C, Dooley L, Ferroni E, Hewak B, et al. Physical  
403 interventions to interrupt or reduce the spread of respiratory viruses: systematic review. *BMJ.*  
404 2008;2008(336):77. doi: 10.1136/bmj.39393.510347.BE.

- 405 29. Asadi S, Cappa CD, Barreda S, Wexler AS, Bouvier NM, Ristenpart WD. Efficacy of masks  
406 and face coverings in controlling outward aerosol particle emission from expiratory  
407 activities. *Sci Rep.* 2020;10:15665. doi: 10.1038/s41598-020-72798-7.
- 408 30. O'Kelly E, Pirog S, Ward J, Clarkson PJ. Ability of fabric face mask materials to filter  
409 ultrafine particles at coughing velocity. *BMJ Open.* 2020;10(9):e039424.  
410 <http://dx.doi.org/10.1136/bmjopen-2020-039424>.
- 411 31. Ferrari SLP, Cribari-Neto F. Beta regression for modelling rates and proportions. *J Appl Stat.*  
412 2004;31(7): 799-815. doi: 10.1080/0266476042000214501.
- 413 32. Cribari-Neto F, Zeileis A. Beta regression in R. *J Stat Soft.* 2010;34(2):1-24. doi:  
414 10.18637/jss.v034.i02.
- 415 33. Smithson M, Verkuilen J. A better lemon squeezer? Maximum-likelihood regression with  
416 beta-distributed dependent variables. *Psych Methods.* 2006;11(1):54-71. doi: 10.1037/1082-  
417 989x.11.1.54.
- 418 34. RStudio Team. RStudio: integrated development Environment for r. RStudio Team, Boston,  
419 Massachusetts, USA. <http://www.rstudio.com>. 2018 [cited 2021 Jan 21].
- 420 35. R Core Team. R: A language and environment for statistical computing. R Foundation for  
421 Statistical Computing, Vienna, Austria. <https://www.R-project.org>. 2020 [cited 2021 Jan 21].
- 422 36. Tjur, T. Coefficients of determination in logistic regression models – A new proposal: The  
423 coefficient of discrimination. *Am Stat.* 2009;63(4):366 – 372. doi: 10.1198/tast.2009.08210.
- 424 37. Agrawal A, Bhardwaj R. Reducing chances of COVID-19 infection by a cough cloud in a  
425 closed space. *Phys Fluids* 2020;32:101704. doi: 10.1063/5.0029186.

- 426 38. Escombe AR, Oeser CC, Gilman RH, Navincopa M, Ticona E, Pan W, et al. Natural  
427 ventilation for the prevention of airborne contagion. *PLoS Med.* 2007;4(2):e68. doi:  
428 10.1371/journal.pmed.0040068.
- 429 39. Smieszek T, Lazzari G, Salathé M. Assessing the dynamics and control of droplet- and  
430 aerosol-transmitted influenza using an indoor positioning system. *Sci Rep.* 2019;9:2185. doi:  
431 10.1038/s41598-019-38825-y.
- 432 40. Lee KK, Savani A, Matos S, Evans DH, Pavord ID, Birring SS. Four-hour cough frequency  
433 monitoring in chronic cough. *CHEST.* 2012;142(5):1237-1243. doi: 10.1378/chest.11-3309.
- 434 41. Kwon S-B, Park J, Jang J, Cho Y, Park D-S, Kim C, et al. Study on the initial velocity  
435 distribution of exhaled air from coughing and speaking. *Chemosphere.* 2012;87(11):1260-  
436 1264. doi: 10.1016/j.chemosphere.2012.01.032.
- 437 42. Bourouiba L, Dehandschoewercker E, Bush JWM. Violent expiratory events: on coughing  
438 and sneezing. *J Fluid Mech.* 2014;745(2014):537-563. doi: 10.1017/jfm.2014.88.
- 439 43. Das SK, Alam J, Plumari S, Greco V. Transmission of airborne virus through sneezed and  
440 coughed droplets. *Phys Fluids.* 2020;32:097102. doi: 10.1063/5.0022859.
- 441 44. Fryar CD, Kruszon-Moran D, Gu Q, Ogden CL. Mean body weight, height, waist  
442 circumference, and body mass index among adults: United States, 1999–2000 through 2015–  
443 2016. *National Health Statistics Reports, No. 122.* United States National Center for Health  
444 Statistics, Hyattsville, MD, USA. 2018. <https://stacks.cdc.gov/view/cdc/61430>.
- 445 45. Wölfel R, Corman VM, Guggemos W, Sailmaier M, Zange S, Müller MA, et al. Virological  
446 assessment hospitalized patients with COVID-2019. *Nature* 2020;581(2020): 465-469. doi:  
447 10.1038/s41586-020-2196-x.

- 448 46. Castillo JE, Weibel JA. A point sink superposition method for predicting droplet interaction  
 449 effects during vapor-diffusion-driven dropwise condensation in humid air. *Int J Heat Mass*  
 450 *Trans.* 2018;118(2018):708-719. doi: 10.1016/j.ijheatmasstransfer.2017.11.045.
- 451 47. Chao CYH, Wan MP, Morawska L, Johnson GR, Ritovski ZD, Hargreaves M, et al.  
 452 Characterization of expiration air jets and droplet size distributions immediately at the mouth  
 453 opening. *J. Aerosol Sci.* 2009;40(2):122-133. doi: 10.1016/j.jaerosci.2008.10.003.

454 **Tables**

455 Table 1. Parameter descriptions for simulations of the Skagit County, WA March 2020 SARS-  
 456 CoV-2 transmission case study.

| Parameter/Model Input                                      | Value(s)                                            | Reference(s)       |
|------------------------------------------------------------|-----------------------------------------------------|--------------------|
| <i>Infectiousness parameters</i>                           |                                                     |                    |
| Cough frequency (coughs/min)                               | 0.19                                                | 40                 |
| Droplet count (droplets/expectoration)                     | 9.7e <sup>5</sup> (3.9e <sup>5</sup> ) <sup>†</sup> | 21, Appendix<br>S2 |
| Droplet spread angle – coughing (°)                        | 35                                                  | 41                 |
| Droplet spread angle – not coughing (°)                    | 63.5                                                | 41                 |
| Droplet travel distance – coughing (m)                     | 5 (0.256) <sup>†</sup>                              | 42                 |
| Droplet travel distance – not coughing (m)                 | 0.55 (0.068) <sup>†§</sup>                          | 43                 |
| <i>Scenario environment and individual behavior inputs</i> |                                                     |                    |
| Area (m <sup>2</sup> )                                     | 180*                                                | 2                  |
| Expectoration height (m)                                   | 1.7                                                 | 44                 |
| Inhalation rate (m <sup>3</sup> air/min)                   | 0.023                                               | 27                 |

|                                                               |                                 |             |
|---------------------------------------------------------------|---------------------------------|-------------|
| Maximum people in a single 1-m <sup>2</sup> patch<br>(people) | 2                               | 2           |
| Number of symptomatic individuals (people)                    | 1                               | 2           |
| <i>Scenario virion behavior inputs</i>                        |                                 |             |
| Virion count (virions/mL fluid)                               | 2.35e <sup>9</sup>              | 45          |
| Virion decay rate (%/min)                                     | 1.05                            | 11          |
| Virion infection risk (%/inhaled virion)                      | 6.24                            | Appendix S2 |
| <i>Scenario airflow inputs</i>                                |                                 |             |
| Diffusion rate (m <sup>3</sup> /min)                          | 1.5e <sup>-3</sup>              | 46          |
| Forced air                                                    | on, off                         | –           |
| Forced air direction                                          | North-to-South, East-to-West    | –           |
| Air change rate (%/min)                                       | 4.3                             | 21          |
| Re-circulated air filtration (%/min)                          | 90                              | 21          |
| <i>Scenario intervention inputs</i>                           |                                 |             |
| Attempted social distancing (m)                               | 0, 1, 2, 3                      | –           |
| Contact duration (min)                                        | 20, 40, 60, 90, 105, 150        | –           |
| Mask efficacy (%)                                             | 0 <sup>‡</sup> , 25, 50, 75, 90 | 28, 29      |
| Population (people)                                           | 10, 50, 61                      | 2, 16       |

457 \*Simulated worlds were 10 m X 18 m. †Standard deviations are given in parentheses. ‡Zero-  
 458 percent mask efficacy is equivalent to no mask use. §Das et al. (2020) (45) estimated the average  
 459 travel distance of a 100-micrometer droplet expelled from a height of 1.7 m at a velocity of 0.5  
 460 m/s to be 0.55 m. They also found that the majority of 100-µm droplets will fall 0.55-2.35 m

461 away from the expelling individual, depending on initial velocity, but droplets may settle up to  
 462 3.2 m away very rarely. a random draw of 10,000,000 samples from a log-normal distribution  
 463 parameterized using 1.7-m and 0.2095-m droplet spread distance mean and standard deviation  
 464 values, respectively, generated a distribution in line with this finding. The standard deviation we  
 465 use in simulations for non-coughing expectoration is proportionate to the one used in this random  
 466 draw.

467

468 Table 2. Parameter descriptions for ventilation-system effect evaluations.

| Parameter/Model Input                                      | Value(s)                                                                        | Reference(s)       |
|------------------------------------------------------------|---------------------------------------------------------------------------------|--------------------|
| <i>Infectiousness parameters</i>                           |                                                                                 |                    |
| Cough frequency (coughs/min)                               | 0.19                                                                            | 40                 |
| Droplet count (droplets/expectoration) <sup>†</sup>        | 1,000 (0) <sup>‡</sup> , 9.7e <sup>5</sup><br>(3.9e <sup>5</sup> ) <sup>‡</sup> | 21, Appendix<br>S2 |
| Droplet spread angle – coughing (°)                        | 35                                                                              | 41                 |
| Droplet spread angle – not coughing (°)                    | 63.5                                                                            | 41                 |
| Droplet travel distance – coughing (m)                     | 5 (0.256) <sup>‡</sup>                                                          | 42                 |
| Droplet travel distance – not coughing (m)                 | 0.55 (0.068) <sup>‡§</sup>                                                      | 43                 |
| <i>Scenario environment and individual behavior inputs</i> |                                                                                 |                    |
| Area (m <sup>2</sup> ) <sup>*</sup>                        | 9, 36, 81                                                                       | –                  |
| Expectoration height (m)                                   | 1.7                                                                             | 44                 |
| Inhalation rate (m <sup>3</sup> air/min)                   | 0.023                                                                           | 27                 |
| Maximum people in a single 1-m <sup>2</sup> patch (people) | 2                                                                               | 2                  |
| Number of infectious individuals (people)                  | 1                                                                               | –                  |

|                                                               |                                                                                                                   |             |
|---------------------------------------------------------------|-------------------------------------------------------------------------------------------------------------------|-------------|
| Proportion of infectious individuals that are symptomatic (%) | 0, 100                                                                                                            | –           |
| <i>Scenario virion behavior inputs</i>                        |                                                                                                                   |             |
| Virion count (virions/mL fluid)                               | 2.35e <sup>9</sup>                                                                                                | 45          |
| Virion decay rate (%/min)                                     | 1.05, 5 <sup>¶</sup> , 10 <sup>¶</sup> , 25 <sup>¶</sup> , 50 <sup>¶</sup> ,<br>75 <sup>¶</sup> , 90 <sup>¶</sup> | 11          |
| Virion infection risk (%/inhaled virion)                      | 6.24                                                                                                              | Appendix S2 |
| <i>Scenario airflow inputs</i>                                |                                                                                                                   |             |
| Diffusion rate (m <sup>3</sup> /min)                          | 1.5e <sup>-3</sup>                                                                                                | 46          |
| Forced air                                                    | on, off                                                                                                           | –           |
| Forced air direction **                                       | East-to-West                                                                                                      | –           |
| Air change rate (%/min)                                       | 0 <sup>#</sup> , 1 <sup>¶</sup> , 5 <sup>¶</sup> , 10 <sup>¶</sup> , 25 <sup>¶</sup> , 50 <sup>¶</sup>            | –           |
| Re-circulated air filtration (%/min)                          | 0 <sup>#</sup> , 1 <sup>¶</sup> , 5 <sup>¶</sup> , 90 <sup>¶</sup> , 100 <sup>¶</sup>                             | –           |
| <i>Scenario intervention inputs</i>                           |                                                                                                                   |             |
| Attempted social distancing (m)                               | 0                                                                                                                 | –           |
| Contact duration (min)                                        | 10, 30, 60                                                                                                        | –           |
| Mask efficacy (%)                                             | 0 <sup>††</sup>                                                                                                   | –           |
| Population density (people/m <sup>2</sup> ) <sup>‡‡</sup>     | 0.333, 0.667, 1, 1.667                                                                                            | –           |

469

470 \*All simulated worlds were square-shaped. †Based on linear modeling described in Appendix S2,

471 these values equate to 1 (SD = 0) and 970 (SD = 390) quanta/hr. ‡Standard deviations are given

472 in parentheses. §Das et al. (2020) (45) estimated the average travel distance of a 100-micrometer

473 droplet expelled from a height of 1.7 m at a velocity of 0.5 m/s to be 0.55 m. They also found



474 that the majority of 100- $\mu$ m droplets will fall 0.55-2.35 m away from the expelling individual,  
 475 depending on initial velocity, but droplets may settle up to 3.2 m away very rarely. a random  
 476 draw of 10,000,000 samples from a log-normal distribution parameterized using 1.7-m and  
 477 0.2095-m droplet spread distance mean and standard deviation values, respectively, generated a  
 478 distribution in line with this finding. The standard deviation we use in simulations for non-  
 479 coughing expectoration is proportionate to the one used in this random draw. ¶These parameter  
 480 values were only used when the “Forced air” parameter value was set to “on.” #These parameter  
 481 values were only used when the “Forced air” parameter value was set to “off.” \*\*All patches on  
 482 the east side of the simulated world acted as supply vents. All patches on the west side acted as  
 483 return vents. ††Zero-percent mask efficacy is equivalent to no mask use. ‡‡Instead of specifying a  
 484 fixed number of individuals in simulations, we scaled the simulated population with world size.  
 485  
 486 Table 3. Logit scale estimates associated with 1-unit increases in covariate values given by our  
 487 beta-regression model for evaluating intervention effects. Wald 95% confidence intervals are  
 488 given in parentheses.

| <b>Coefficient</b>                   | <b>Estimate</b>         | <b><i>p</i></b> |
|--------------------------------------|-------------------------|-----------------|
| <b>Intercept</b>                     | -2.927 (-2.940, -2.914) | –               |
| <b><math>\phi</math></b>             | 5.808 (5.791, 5.824)    | –               |
| <b>Gathering duration (min)</b>      | 0.012 (0.012, 0.012)    | < 0.001         |
| <b>Mask efficacy (%)</b>             | -0.015 (-0.015, -0.015) | < 0.001         |
| <b>Mask use</b>                      | -0.949 (-0.964, -0.935) | < 0.001         |
| <b>Movement (No. rearrangements)</b> | 0.491 (0.485, 0.497)    | < 0.001         |
| <b>Group size (people)</b>           | 0.001 (0.001, 0.001)    | < 0.001         |

|                                                  |                                                                     |         |
|--------------------------------------------------|---------------------------------------------------------------------|---------|
| <b>Social distancing (m)</b>                     | -0.250 (-0.256, -0.243)                                             | < 0.001 |
| <b>Ventilation</b>                               | 0.898 (0.895, 0.902)                                                | < 0.001 |
| <b>Mask use : Group size</b>                     | 0.014 (0.013, 0.014)                                                | < 0.001 |
| <b>Mask use : Social distancing</b>              | -0.018 (-0.025, -0.010)                                             | < 0.001 |
| <b>Group size : Social distancing</b>            | 0.004 (0.004, 0.004)                                                | < 0.001 |
| <b>Mask use : Group size : Social distancing</b> | 1.923e <sup>-4</sup> (3.039e <sup>-5</sup> , 3.542e <sup>-4</sup> ) | 0.020   |

489

490 Table 4. Logit scale estimates associated with 1-unit increases in covariate values given by our  
 491 logistic-regression model for evaluating effect on SARS-CoV-2 transmission risk during an  
 492 indoor gathering. Wald 95% confidence intervals are given in parentheses.

| <b>Coefficient</b>                                   | <b>Estimate</b>         | <b>Odds ratio</b>       | <b><i>p</i></b> |
|------------------------------------------------------|-------------------------|-------------------------|-----------------|
| <b>Intercept</b>                                     | -0.146 (-0.151, -0.140) | –                       | –               |
| <b>Population density<br/>(people/m<sup>2</sup>)</b> | 2.766 (2.761, 2.771)    | 15.891 (15.813, 15.968) | < 0.001         |
| <b>Gathering duration (min)</b>                      | 0.015 (0.015, 0.015)    | 1.015 (1.015, 1.015)    | < 0.001         |
| <b>Quanta (quanta/hr)</b>                            | 0.002 (0.002, 0.002)    | 1.002 (1.002, 1.002)    | < 0.001         |
| <b>Excess droplet removal rate<br/>(%/min)</b>       | -0.024 (-0.024, -0.024) | 0.976 (0.976, 0.976)    | < 0.001         |
| <b>Air change rate (%/min)</b>                       | 0.017 (0.017, 0.017)    | 1.02 (1.02, 1.02)       | < 0.001         |
| <b>Air filtration rate (%/min)</b>                   | -0.005 (-0.005, -0.005) | 0.995 (0.995, 0.995)    | < 0.001         |

493

494 **Figures**

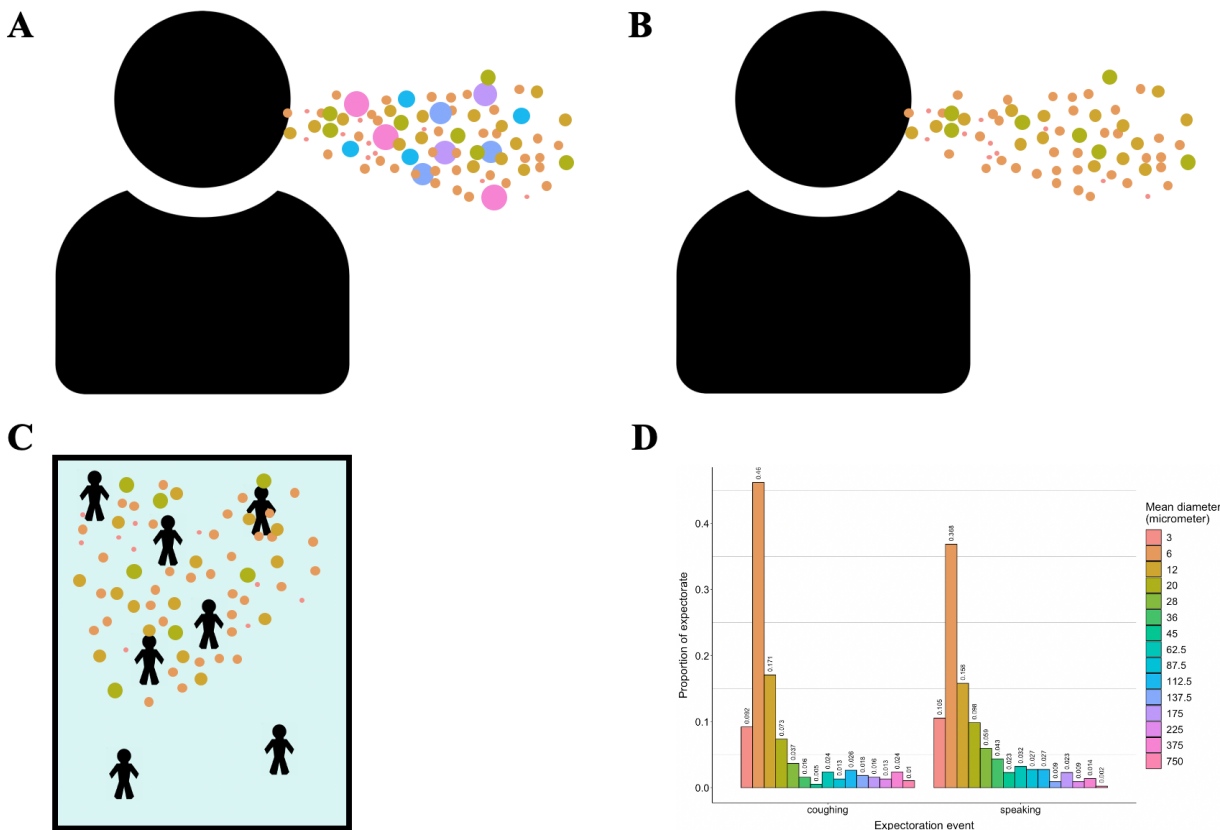

495  
 496 Figure 1. Model droplet dynamics. A) Infectious individuals expel droplets of different sizes. B)  
 497 Relatively large droplets fall out of the air quickly post expectoration. C) Smaller droplets  
 498 remain aerosolized for longer time periods and move throughout the simulated room via  
 499 diffusion and forced airflow effects. D) Distribution of droplet sizes during expectoration events.  
 500 Distributions of size classes during coughing and speaking events are based on findings of (47),  
 501 and represent mean observed droplet-size measurements they recorded 60 mm away from  
 502 individuals' mouths immediately following these activities.

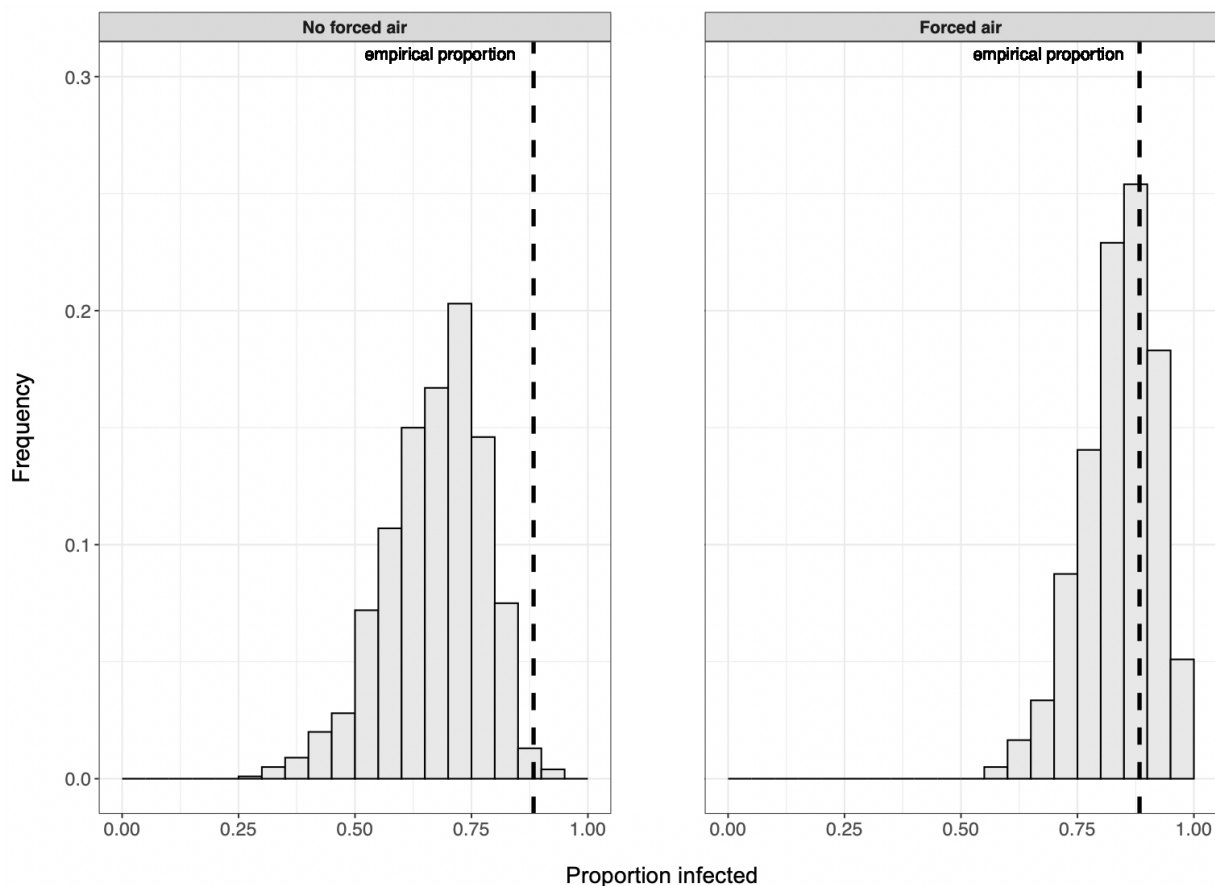

503

504

505

506

Figure 2. In the absence of interventions to reduce transmission risk, the proportion of susceptible people infected in simulations can reflect the case study value (i.e., 0.88) and is more likely to do so when forced airflow is included.

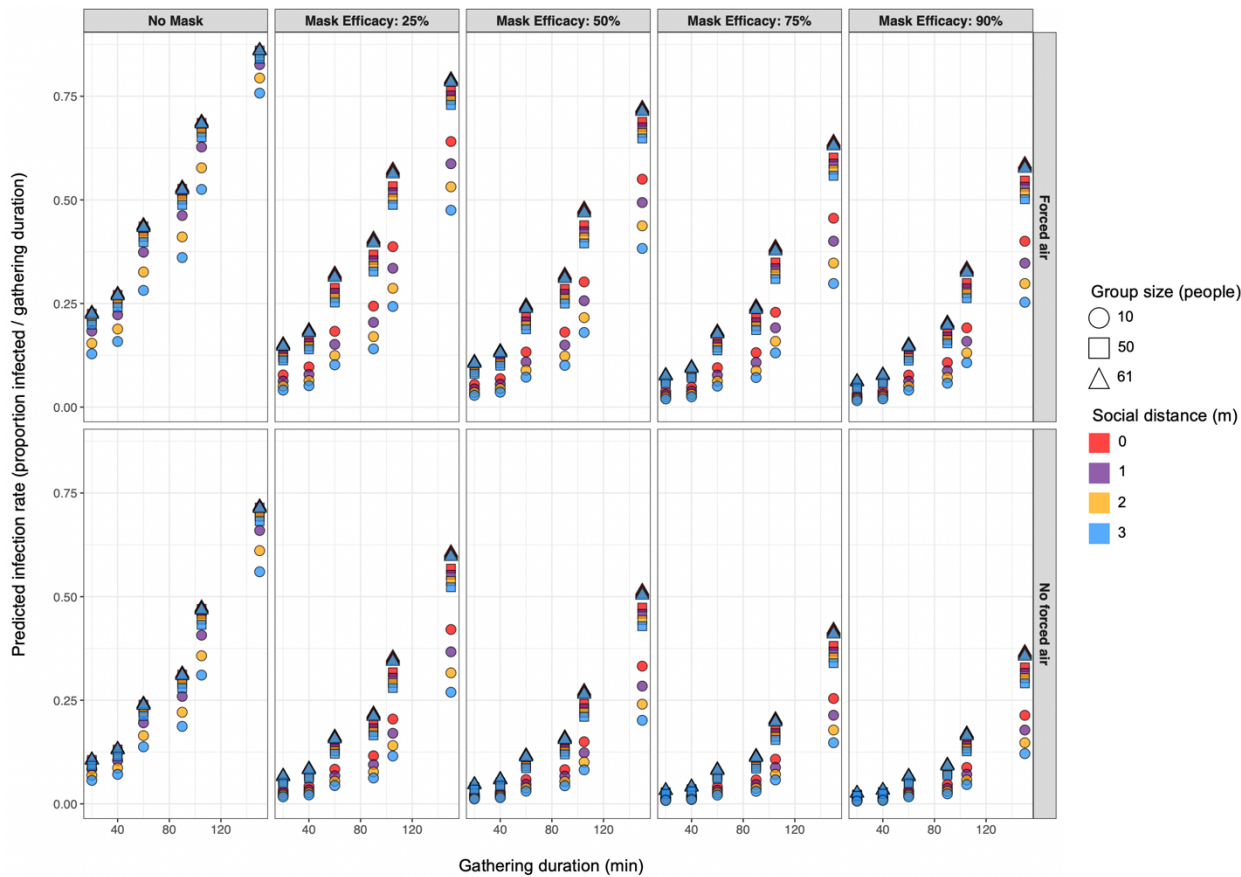

507

508 Figure 3. Predicted proportion of susceptible populations infected with SARS-CoV-2 for varied

509 parameter sets suggest that concurrent deployment of multiple interventions is required to

510 achieve near-zero transmission rates.
