# Supplementary material for: Assessing the efficacy of interventions to control indoor SARS-Cov-2 transmission: an agent-based modeling approach
Source: PubMed Central journal article supplement — medRxiv. 2021 Jan 22:2021.01.21.21250240. Preprint. [Version 1] doi: 10.1101/2021.01.21.21250240 (PMC7836133; doi:10.1101/2021.01.21.21250240), 2021-01-22
Supplement: media-1.pdf [file media-1.pdf]

1 Assessing the efficacy of interventions to control indoor SARS-Cov-2 transmission: an agent-  
2 based modeling approach

3  
4 Trevor S. Farthing & Cristina Lanzas

## 5 6 **Appendix S1 – ODD Model Description**

7  
8 We developed a spatially-explicit, stochastic agent-based model (ABM) to simulate airborne  
9 and direct droplet-mediated respiratory pathogen transmission in indoor settings. This model was  
10 created and executed using the open-source modeling software, NetLogo (Ver. 6.1.1 –  
11 Willensky 1999). Below, we provide a detailed description of our model in accordance with  
12 ODD (Overview, Design concepts, Details) standards outlined by Grimm et al. (2020).

### 13 14 *1. Purpose and patterns*

15  
16 The purpose of this model is to quantify the effect of increasing group density on the  
17 probability of respiratory pathogen transmission from infectious individuals to susceptible ones,  
18 given varied spatial dimension and risk-reduction behavior (e.g., mask use, social distancing,  
19 etc.) levels in indoor settings. The ability of our model to accurately simulate infection events is  
20 predicated on its ability to recreate four processes involved in transmission: 1.) Susceptible  
21 individuals become infected through inhalation of virions contained within infectious droplets of  
22 varying sizes. 2.) Infectious agents expel infectious droplets of varying sizes, and droplets'  
23 movement, fallout, and virion-carriage rates vary with droplet size. 3.) Symptomatic infectious  
24 agents are likely to infect more susceptible individuals than asymptomatic ones, as coughing  
25 expels infectious droplets farther than does breathing or speaking alone (Kwon et al. 2012). 4.)  
26 Susceptible individuals' probability of infection can be lessened if individuals employ extra  
27 measures to avoid transmission (e.g., wearing face masks).

### 28 29 *2. Entities, state variables, and scales*

30  
31 There are two mobile agents (i.e., NetLogo agents capable of movement) in our model:  
32 *People* and *AirArrows*. *People* in our model represent people congregating in fixed space (e.g.,  
33 students in a classroom, people watching a movie in a theatre, etc.), while *AirArrows* control the  
34 direction of simulated airflow in the space when ventilation-induced airflow is being simulated.  
35 Patches (i.e., grid cells in the NetLogo model interface) in our model represent  $1 \times 1 \text{ m}^2$  areas.  
36 When a simulation begins, spawned people can be susceptible, infectious and symptomatic (i.e.,  
37 these agents represent individuals who spread the pathogen via coughing, sneezing, etc.), or  
38 infectious and asymptomatic (i.e., these agents represent individuals who spread the infection  
39 through breathing or speaking alone). Over the course of any simulation, susceptible agents may  
40 become infected with a pathogen following exposure to infectious droplets expelled from  
41 symptomatic and/or asymptomatic agents. The global environment dictates the size of the fixed  
42 space, total number of agents in the model, number of these agents that are infectious, as well as  
43 the dynamics and probabilities of infection events and airborne droplet movement within the  
44 model. Global, agent, and patch variables are described in Table S1-1, where we also make the  
45 distinction between parameters (i.e., static variables that are unchanging within simulations) and  
46 dynamic variables that may vary within simulations. The spatial extent of our model can range

47 from 1 to  $\infty$  m<sup>2</sup>, and is controlled by the *grid\_height* and *grid\_length* parameters. Each tick (i.e.,  
48 one-unit time step) in our model represents a one-minute progression.  
49

50

### 51 3. Process overview and scheduling

52

53 Model processes are outlined in Figure S1-1 and described in detail herein. Upon  
54 initialization, a world with *grid\_height* \* *grid\_length* patches is generated. Following world  
55 creation, *n* susceptible people spawn within patches. People spawn one at a time and, if the  
56 *social-distance* parameter is > 0 m, they appear at a random location at least *social-distance* from  
57 any other person. If there is no available space  $\geq$  *social-distance* from any person, newly  
58 spawned people will be placed at a random location as far away from others as possible. If  
59 *social-distance* equals 0 m, people spawn in completely random locations. Once spawning is  
60 completed, *n\_infectious* people are randomly selected from the pool of susceptible agents to  
61 transition to the “infectious” health state. Infectious people have a *symp-pr* probability of being  
62 classified as “symptomatic” and a 1 - *symp-pr* probability of being “asymptomatic.” All people  
63 are asked to set their heading (i.e., direction they are facing) to a random direction between 0° –  
64 360° if *face-northward* is FALSE, or between 315° – 405° if *face-northward* is TRUE. People  
65 have a *mod-proportion* probability to wear masks in the simulation, and the affected groups (i.e.,  
66 susceptible only, infectious only, or both susceptible and infectious individuals) that may  
67 transition to wearing masks are designated by the *mod\_group* parameter. Masked people are then  
68 asked to update their *exposureRisk* and *expectorateRisk* variable values. The default values for  
69 each variable is 100%, but will change to the *maskRisk-mod* parameter value.  
70

70

71 The final aspect of simulation setup is to establish agents for simulating ventilation airflow if  
72 *ventilation* is TRUE. To create a supply and return vent(s), *numSupplyVents* and  
73 *numReturnVents* patches on *ventilSupplyWall* and *ventilReturnWall* world borders are designated  
74 as supply and return vents, respectively. All non-return-vent patches are asked to spawn a single  
75 airArrow. All airArrows are asked to set their heading towards the closest return vent patch.  
76 AirArrow headings will be used to direct ventilation airflow. This concludes the simulation setup  
77 procedure.  
78

78

79 Following setup, the simulation begins in earnest. If *ventilation* is TRUE, the first task to take  
80 place each tick is to move droplets towards return vents. We assume very simple ventilation-  
81 induced air movement within an enclosed room where air moves only towards the return vent(s),  
82 and return vent patches transfer a proportion of droplets present there to supply vent patches  
83 while also removing some droplets from the simulation. To achieve this, we ask all patches to  
84 count the number of droplets in each size class (Figure S1-2) that will be transferred to the next  
85 patch (i.e.,  $num_{d_p} * ventil\_movementRate$ , where  $num_{d_p}$  is the number of droplets of a given  
86 size class *d* in patch *p*). Then we simultaneously ask non-return vent patches to transfer these  
87 droplets to patches 1-patch ahead of airArrows, and ask return vent patches to transfer  
88

88

$$89 \quad num_{d_p} * ventil\_movementRate * (1 - ventil\_removalRate)$$

90

91 droplets to supply vents, and to remove

92

93  $num_{d,p} * ventil\_movementRate * ventil\_removalRate$

94  
95 from the simulation.

96  
97 Non-ventilation related droplet removal is the second action to occur every tick. This action  
98 represents droplet/virion removal from the local environment due to inhalation by individuals,  
99 gravitational settling, and general droplet decay. For each droplet size class, we ask all patches to  
100 remove

101  
102  $\left\{ \left( \frac{vol\_B}{1\text{ m} * 1\text{ m} * expectorateHeight} * People_p \right) + \left( \frac{Vt\_diam_d}{expectorateHeight} \right) + dropletDecay \right\} * num_{d,p}$

103  
104 droplets, where  $\frac{vol\_B}{1\text{ m} * 1\text{ m} * expectorateHeight}$  is the proportion of air within the patch inhaled by a  
105 single person each minute,  $People_p$  is the number of people on patch  $p$ ,  $Vt\_diam_d$  is the  
106 calculated terminal velocity (i.e., the maximum free-falling speed in m/min, assuming the force  
107 of gravity acting on an object is  $9.8\text{ m/s}^2$ ) of droplets in a size class  $d$  (Figure S1-3), and  $num_{d,p}$   
108 is the number of droplets of a given size class  $d$  in patch  $p$ . If patches would remove  $> 100\%$  of  
109 any size class, we ask them to instead set that  $num_{d,p}$  to zero. Thus, we ensure that no patch can  
110 ever have a negative number of droplets.

111  
112 Next, we ask patches to diffuse droplets of all size classes to neighbors (i.e., all patches  
113 touching them) at rate  $diffusionRate$ . We once again ask all patches to count the number of  
114 droplets in each size class that will be transferred to the neighbors (i.e.,  $num_{d,p} * diffusionRate$ ).  
115 Then, we ask patches to evenly distribute these droplets to neighbors.

116  
117 Infectious people,  $i \in I$ , expectorate droplets and exposed susceptible individuals,  $s \in S$ ,  
118 may become infected. Each tick, every symptomatic person has a  $cough\_frequency$  probability  
119 to cough (i.e., expel droplets relatively far out from themselves), and  $(1 - cough\_frequency)$   
120 probability to expectorate in accordance with the “non-coughing” schema (i.e., expel droplets  
121 relatively close to themselves). Asymptomatic people have no chance to cough, and will  
122 expectorate in accordance with the “non-coughing” schema with 100% probability. While  
123 droplet spread distance and angle for this schema can be modulated via model input values to  
124 reflect numerous activities (e.g., speaking, breathing, etc.), the droplet size distribution is  
125 assumed to reflect that of speaking events (Figure S1-2). Thus, parameters referring to aspects of  
126 the “non-coughing” schema are coded as “speak” parameters (e.g.,  $speak\_airflow\_angle$ ).

127  
128 During expulsion events, droplets spread to patches in front of coughing and speaking  
129 infectious people in cones with semi-vertex angles of  $cough\_airflow\_angle$  and  
130  $speak\_airflow\_angle$ , respectively, and lengths randomly drawn from lognormal distributions.  
131 Lognormal distributions were obtained by exponentiating Poisson distributions with known  
132 means and standard deviations, in accordance with methods described by Railsback & Grimm  
133 (2011). In our model, lognormal distributions to inform droplet travel distances from coughing  
134 and speaking people are generated from known mean and standard deviation pairs:  
135  $cough\_spread\_dist.mean$ ,  $cough\_spread\_dist.sd$ , and  $speak\_spread\_dist.mean$ ,

136 *speak\_spread\_dist.sd*, respectively. If infectious people are wearing masks, only the patch they  
137 are in is contaminated (i.e., cones of excretion in these cases have lengths of 0).

138  
139 The number of droplets that infectious people expel at time  $t$ ,  $dropletNum_{it}$ , is determined  
140 by sampling from another lognormal distribution with known means of *speak\_dropletNum.mean*  
141 or *cough\_dropletNum.mean*, and standard deviations of *speak\_dropletNum.sd* or  
142 *cough\_dropletNum.sd*, depending on if people are speaking or coughing, then multiplying this  
143 sample value by *expectorateRisk<sub>i</sub>*. We assume that people expectorate droplets of 16 size  
144 classes, with increasingly large mean diameters. We accept the size class frequency distributions  
145 for speaking and coughing events given by Chao et al. (2009) and shown in Figure S1-2, and  
146 enforce these distributions in our model. We assume that all droplets are evenly distributed  
147 between and within contaminated patches.

148  
149 After infectious individuals expectorate, we assess if any susceptible individuals will  
150 transition to infected status. The number of virions (i.e., live pathogen capable of causing  
151 infection in susceptible individuals) in a patch,  $virions_p$ , is given by the equation

$$152 \quad virions_p = \sum_{d=1}^D (virionsPerML * Vol_d * num_{d_p}),$$

154  
155 where  $Vol_d$  is the mean volume (in mL) of droplets in each size class, calculated using the  
156 equations presented by Anchordoqui & Chudnovsky (2020). The probability that a susceptible  
157 person on patch  $p$  is infected at any given time is

$$159 \quad pr(infection)_s = virions_p * virionRisk * \frac{vol_B}{1\text{ m} * 1\text{ m} * expectorateHeight} * exposureRisk_s$$

160  
161 where,  $virions_p$  is the number of virions in the patch containing the individual.

162  
163 If  $numCohorts = 1$ , the simulation ends after *cohort\_dur* ticks have elapsed. If  $numCohorts >$   
164 1, the simulation will last for  $numCohorts * cohort\_dur$  ticks. In this case, every *cohort\_dur*  
165 ticks, if *rearrange-cohort* is TRUE, all people will move to randomly-selected patches while still  
166 adhering to *social-distance* and *personPerPatch-cap* rules. People will set a new heading in  
167 accordance with *face-northward*. If *rearrange-cohort* is FALSE, all people are killed, and an  
168 equal number of people will spawn while adhering to *social-distance* and *personPerPatch-cap*  
169 rules. All people in the new cohort will be susceptible to infection (i.e., infectious people only  
170 exist in the first cohort).

#### 171 172 4. Design concepts

173  
174 Infection in our model is driven by inhalation of virions contained in droplets of varying  
175 sizes. Fomite-driven transmission, by design, is outside the scope of our model. Regarding  
176 aerosol transmission, for simplicity, we assume that droplets fall from *expectorateHeight* m at  
177 terminal velocity and our droplet-size distribution represents post-evaporation sizes. These  
178 assumptions are reasonable given the rapid speed at which droplets evaporate and reach terminal  
179 velocity (Noakes et al. 2006; Xie et al. 2007; Anchordoqui & Chudnovsky 2020), and allow us  
180 to discount local humidity, temperature, and micro-scale airflow effects on the spatial

181 distribution of droplets within the model. Droplet size class terminal velocity is calculated using  
 182 the equations presented by Anchordoqui & Chudnovsky (2020), and droplet sizes incapable of  
 183 settling on the ground from *expectorateHeight* m within one tick (i.e., one minute) are allowed to  
 184 move between patches via ventilation- and diffusion-induced airflow. As the number of virions  
 185 within a patch is dependent on the number of droplets in each size class, spatial infection-risk  
 186 heterogeneity is therefore a function of global airflow parameters and the placement of infectious  
 187 people throughout the simulated world. For simplicity, we assume that mechanism of droplet-  
 188 mediated pathogen transmission is the same (i.e., inhalation) for droplets of all size classes. We  
 189 do realize, however, that in reality larger droplets are relatively less-likely to be inhaled and  
 190 instead mediate transmission through contact with unprotected mucus membranes (Milton 2020).

191  
 192 We assume that the volume of air in each patch at any given time is *expectorateHeight* m<sup>3</sup>  
 193 (i.e., 1 m \* 1 m \* *expectorateHeight*) and that droplets are evenly distributed within patches.  
 194 Thus, the per-capita number of virions that people inhale each tick is equal to  
 195

$$196 \quad \text{virions}_p * \frac{\text{vol}_B}{1 \text{ m} * 1 \text{ m} * \text{expectorateHeight}}$$

197  
 198 Wearing a mask to reduce successful pathogen transmission in our model modulates the number  
 199 of droplets expelled by infectious people and the proportion of virions inhaled by susceptible  
 200 individuals. Previous research has quantified the extent to which using personal protective  
 201 equipment may reduce risk of infection with a respiratory pathogen (Jefferson et al. 2008), and  
 202 recent work has shown that masks reduce the number of aerosols expelled by wearers (Asadi *et*  
 203 *al.* 2020). Therefore, we chose to use masks to modify the individual-level probability that  
 204 susceptible individuals will become infected given exposure to infectious droplets in their patch  
 205 (i.e., *exposureRisk*), and the number of droplets individuals will expectorate on any given tick  
 206 (i.e., *expectorateRisk*). In our model, mask use scales both of these variables equally. We  
 207 acknowledge that making these scaling factors equivalent may be unrealistic however, and  
 208 intend to make this a focus of future model improvement if and when more detailed information  
 209 on mask-induced effects on pathogen transmission become available.

210  
 211 As previously noted, in our model we characterize infectious people as asymptomatic or  
 212 symptomatic. “Symptomatic” here refers to agents representing individuals that present any  
 213 respiratory-disease symptoms (e.g., coughing, sneezing, etc.). We parameterize droplet behavior  
 214 for symptomatic and asymptomatic collectives separately because we expect them to drive  
 215 infections through different means. For example, asymptomatic individuals will likely spread  
 216 infectious droplets by simply breathing near or talking to susceptible people. Symptomatic  
 217 individuals, on the other hand, may also frequently spread droplets through coughing, sneezing,  
 218 or similar events. Airflow angle and velocity associated with these means of infection are  
 219 substantially different (Kwon *et al.* 2012) and as such, necessitate separate parameters if both  
 220 symptomatic and asymptomatic agents can exist in simulations simultaneously.

221  
 222 Agents in our model have extremely limited movement (i.e., unless *rearrange-cohort* is  
 223 TRUE and *num-cohorts* > 1, people will be completely unmoving), but people are spawned  
 224 relatively far away from one another if the *social\_distance* parameter is > 0. As such, our model  
 225 is best used for estimating transmission risk associated with scenarios where individuals are

226 generally unmoving (e.g., students in a classroom). Scenarios like students watching a  
227 presentation at the front the room or patrons attending a show in a theatre can be further  
228 emulated if users so choose by setting *face-northward* to TRUE. Users may also simulate well-  
229 mixed population interactions by setting *rearrange-cohort* to TRUE and *num-cohorts* > 1.  
230 Activity-specific movements may modulate infection risk (e.g., doctors must get close to patients  
231 in order to physically examine them), but are outside the scope of our model.

232  
233 This is a simple model with little adaptive agent behavior, three collectives for people agents  
234 (i.e., “susceptible,” “infectious: asymptomatic”, and “infectious: symptomatic”), and only one  
235 action that can be considered to be a direct interaction between agents. That is, when a  
236 simulation begins or cohorts are rearranged/replaced, newly-spawned people learn where  
237 previously-spawned ones exist and attempt to ensure that sufficient space exists between  
238 themselves and others in accordance with the *social distance* parameter value. Their objective is  
239 to maintain effective social distances to minimize infection risk. Accordingly, model outputs  
240 (e.g., the number of susceptible people infected, time to first infection, and average inter-agent  
241 distance) are influenced by emergent patterns triggered by this behavior. No other examples of  
242 adaptive behavior, sensing, prediction, or learning, as defined by Grimm et al. (2020), exist.

243  
244 Stochasticity is introduced to the model in four ways during simulation initialization, then is  
245 further incorporated in four actions that take place during each subsequent time step. At  
246 initialization stochasticity is introduced when: 1.) people decide their initial placement, 2.)  
247 subsets of people are randomly designated as infectious, 3.) *mod-proportion* \* 100% of people  
248 *exposureRisk* and *expectorateRisk* values are changed from 1 to *maskRisk-mod*, and 4.) if  
249 *ventilation* is TRUE but *equallySpaceVents* is FALSE, return and supply vent locations will be  
250 randomly decided (though these locations will still be confined to appropriate walls of the  
251 world). During each time step, stochasticity plays a role in: 5.) determining if infectious agents  
252 expel droplets, 6.) drawing droplet travel distances from lognormal distributions, 7.) drawing the  
253 number of droplets produced in expectoration events from lognormal distributions, and 8.)  
254 assessing whether exposed susceptible agents transition to “infected” status. We incorporated  
255 stochasticity into these processes to introduce plausible variation into simulations.

256  
257 The key outputs of this model are: 1.) the number of successful infections (i.e., susceptible  
258 agents’ health statuses changed from “healthy” to “infected”) each tick, and 2.) the time of the  
259 first successful infection in the simulation. In addition to the primary outputs, our model also  
260 keeps track of the average distance (in m) between individuals, and all “infected” people record  
261 the number of droplets of each size class contained within their patch at the time of infection.  
262 This allows us to not only assess parameter effects on transmission rates, but also estimate the  
263 proportion of people infected by aerosols.

## 264 265 5. Initialization

266  
267 All global parameters aside from those controlling transmission mechanics (e.g., airflow  
268 angles, mean and standard deviation travel distances, number of virions in droplets, etc.) or  
269 airflow rates influence model initialization (i.e., how many agents and patches are created, where  
270 they spawn, and what their initial state-variable values are). Model actions associated with

271 initialization are outlined in Section 3. Herein we discuss the rationale in allowing the  
272 aforementioned parameters to vary between simulations.

273

274 The primary purpose of this model is to assess the effect of population density on  
275 transmission risk. Population density in our model, expressed in terms of people/m<sup>2</sup>, is given by  
276 the equation

277

$$278 \frac{n}{grid\_height * grid\_length}$$

279

280 We allow the size of our modeled world to vary, in addition to  $n$ , as there may be an interaction  
281 between world size and *social\_distance* levels that may ultimately cause the observed number of  
282 infections to vary. After all, the maximum distance that agents can spread out from one another is  
283 limited by the space available to them.

284

285 We tried to make the model flexible enough to test multiple hypotheses about implementing  
286 risk-reducing strategies (e.g., social distancing, mask use, etc.). This is the primary impetus  
287 adding the *social\_distance*, *maskRisk-mod*, and *mod-proportion* parameters. Similarly, the *vol\_B*  
288 parameter exists so that we can assess how infection risk changes in response to different group  
289 activities people may be participating in that are associated with different breathing rates (e.g.,  
290 choir practice vs. attending a lecture), the *virionsPerML* and *virionRisk* parameters exist to  
291 ensure that our model can be used to simulate transmission of different pathogens for which  
292 these values are known or can be estimated.

293

## 294 6. Input data

295

296 No model processes are driven by external data. No external data are imported into the model.

297

## 298 7. Sub-models

299

300 All sub-models are comprehensively described in sections 3-5 and outlined in Figure S1-1.

301

## 302 8. References

303

- 304 1. Anchordoqui LA, Chudnovsky EM. A physicist view of COVID-19 airborne infection  
305 through convective airflow in indoor spaces. *SciMed J.* 2020;2:68-72. doi:  
306 10.28991/SciMedJ-2020-02-SI-5.
- 307 2. Asadi S, Cappa CD, Barreda S, Wexler AS, Bouvier NM, Ristenpart WD. Efficacy of masks  
308 and face coverings in controlling outward aerosol particle emission from expiratory  
309 activities. *Sci Rep.* 2020;10:15665. doi: 10.1038/s41598-020-72798-7.
- 310 3. Chao CYH, Wan MP, Morawska L, Johnson GR, Ritovski ZD, Hargreaves M, et al.  
311 Characterization of expiration air jets and droplet size distributions immediately at the mouth  
312 opening. *J. Aerosol Sci.* 2009;40(2):122-133. doi: 10.1016/j.jaerosci.2008.10.003.
- 313
- 314
- 315

316 4. Grimm V, Railsback SF, Vincenot CE, Berger U, Gallagher C, DeAngelis DL, et al. The  
317 ODD protocol for describing agent-based and other simulation models: a second update to  
318 improve clarity, replication, and structural realism. *J Artif Soc Soc Simul.* 2020;23(2):7. doi:  
319 10.18564/jasss.4259.

320 5. Jefferson T, Foxlee R, Del Mar C, Dooley L, Ferroni E, Hewak B, et al. Physical  
321 interventions to interrupt or reduce the spread of respiratory viruses: systematic review. *BMJ.*  
322 2008;2008(336):77. doi: 10.1136/bmj.39393.510347.BE.

323

324 6. Kwon S-B, Park J, Jang J, Cho Y, Park D-S, Kim C, et al. Study on the initial velocity  
325 distribution of exhaled air from coughing and speaking. *Chemosphere.* 2012;87(11):1260-  
326 1264. doi: 10.1016/j.chemosphere.2012.01.032.

327

328 7. Milton DK. A Rosetta Stone for understanding infectious drops and aerosols. *Journal of the*  
329 *Ped Infect Dis Soc.* 2020;9(4):413-415. <https://doi.org/10.1093/jpids/piaa079>.

330

331 8. Noakes CJ, Beggs CB, Sleigh PA, Kerr KG. Modelling the transmission of airborne  
332 infections in enclosed spaces. *Epidem Inf.* 2006;134(5):1082-1091. doi:  
333 10.1017/s0950268806005875.

334

335 9. Railsback SF, Grimm V. *Agent-Based and Individual-Based Modeling: a Practical*  
336 *Introduction*, 1<sup>st</sup> edition. Princeton University Press: Princeton, New Jersey, U.S.A. 2011. pp.  
337 195-208.

338

339 10. Wilensky U. NetLogo. Center for Connected Learning and Computer-Based Modeling,  
340 Northwestern University, Evanston, IL. <http://ccl.northwestern.edu/netlogo/>. 1999 [cited  
341 2021 Jan 21].

342

343 11. Xie X, Li Y, Chwang ATY, Ho PL, Seto WH. How far droplets can move in indoor  
344 environments – revisiting the Wells evaporation–falling curve. *Indoor Air.* 2007;17(3):211-  
345 225. doi: 10.1111/j.1600-0668.2007.00469.x.

347 9. *Tables*

348  
349 Table S1-1. Variable descriptions.

350

| NAME                           | TYPE            | UNIT  | PURPOSE                                                                                                                                                                 |
|--------------------------------|-----------------|-------|-------------------------------------------------------------------------------------------------------------------------------------------------------------------------|
| <i>avg.dist</i>                | Global, dynamic | m     | Tracks the average interpersonal distance at each tick.                                                                                                                 |
| <i>avg.PatchInfectiousness</i> | Global, dynamic | -     | Tracks the average probability that exposure to patch virions will lead to infection.                                                                                   |
| <i>can-sprout?</i>             | Patch, dynamic  | -     | Logical variable describing if patches are far enough away from those with people in them that new people can sprout a while keeping the desired social-distance value. |
| <i>cohort</i>                  | Global, dynamic | -     | Identify what cohort is currently being simulated.                                                                                                                      |
| <i>cohort-dur</i>              | Global, static  | min   | The number of ticks that each cohort lasts (i.e., how long each person cohort spends in the simulation).                                                                |
| <i>cohort-endTime</i>          | Global, dynamic | ticks | Denotes the tick value when the current cohort should be replaced, or when the simulation will end.                                                                     |
| <i>cohort-person</i>           | Person, static  | -     | Denotes what cohort the person belongs to.                                                                                                                              |



|                               |                |                      |                                                                                                                                                                                                                                                                                               |
|-------------------------------|----------------|----------------------|-----------------------------------------------------------------------------------------------------------------------------------------------------------------------------------------------------------------------------------------------------------------------------------------------|
| <i>cough_airflow-angle</i>    | Global, static | degrees              | Controls the angle of airflow associated with coughing events. Affects the spread of droplets during a given droplet-expulsion event originating from symptomatic individuals.                                                                                                                |
| <i>cough-frequency</i>        | Global, static | coughs / min         | Probability that cones of infection stemming from symptomatic individuals will be parameterized using <i>cough_airflow-angle</i> , <i>cough_spread-dist.mean</i> , and <i>cough_spread-dist.sd</i> , instead of the asymptomatic counterparts.                                                |
| <i>cough_spread-dist.mean</i> | Global, static | m                    | The mean distance from symptomatic infectious people that droplets may be spread when coughing. This value will be used to generate a lognormal distribution from which droplet-expulsion-spread distance will be randomly drawn when a symptomatic agent triggers a droplet-expulsion event. |
| <i>cough_spread-dist.sd</i>   | Global, static | m                    | The standard deviation distance, given a <i>cough_spread-dist.mean</i> value, from symptomatic infectious people that droplets may be spread when coughing. This value will be used to generate a lognormal distribution from which droplet-expulsion-spread distance will be randomly drawn  |
| <i>diffusionRate</i>          | Global, static | m <sup>2</sup> / min | The rate at which droplets spread to adjacent patches. For simplicity we assume a standardized rate for all droplet sizes.                                                                                                                                                                    |
| <i>droplets_size3</i>         | Patch, dynamic | droplets             | Counts the number of droplets in a size class with a mean size of 3 micrometers.                                                                                                                                                                                                              |
| <i>droplets_size6</i>         | Patch, dynamic | droplets             | Counts the number of droplets in a size class with a mean size of 6 micrometers.                                                                                                                                                                                                              |
| <i>droplets_size12</i>        | Patch, dynamic | droplets             | Counts the number of droplets in a size class with a mean size of 12 micrometers.                                                                                                                                                                                                             |
| <i>droplets_size20</i>        | Patch, dynamic | droplets             | Counts the number of droplets in a size class with a mean size of 20 micrometers.                                                                                                                                                                                                             |
| <i>droplets_size28</i>        | Patch, dynamic | droplets             | Counts the number of droplets in a size class with a mean size of 28 micrometers.                                                                                                                                                                                                             |
| <i>droplets_size36</i>        | Patch, dynamic | droplets             | Counts the number of droplets in a size class with a mean size of 36 micrometers.                                                                                                                                                                                                             |
| <i>droplets_size45</i>        | Patch, dynamic | droplets             | Counts the number of droplets in a size class with a mean size of 45 micrometers.                                                                                                                                                                                                             |
| <i>droplets_size62.5</i>      | Patch, dynamic | droplets             | Counts the number of droplets in a size class with a mean size of 62.5 micrometers.                                                                                                                                                                                                           |
| <i>droplets_size87.5</i>      | Patch, dynamic | droplets             | Counts the number of droplets in a size class with a mean size of 87.5 micrometers.                                                                                                                                                                                                           |
| <i>droplets_size112.5</i>     | Patch, dynamic | droplets             | Counts the number of droplets in a size class with a mean size of 112.5 micrometers.                                                                                                                                                                                                          |
| <i>droplets_size137.5</i>     | Patch, dynamic | droplets             | Counts the number of droplets in a size class with a mean size of 137.5 micrometers.                                                                                                                                                                                                          |
| <i>droplets_size175</i>       | Patch, dynamic | droplets             | Counts the number of droplets in a size class with a mean size of 175 micrometers.                                                                                                                                                                                                            |
| <i>droplets_size225</i>       | Patch, dynamic | droplets             | Counts the number of droplets in a size class with a mean size of 225 micrometers.                                                                                                                                                                                                            |
| <i>droplets_size375</i>       | Patch, dynamic | droplets             | Counts the number of droplets in a size class with a mean size of 375 micrometers.                                                                                                                                                                                                            |
| <i>droplets_size750</i>       | Patch, dynamic | droplets             | Counts the number of droplets in a size class with a mean size of 750 micrometers.                                                                                                                                                                                                            |
| <i>droplets_size3AtInf</i>    | People, static | droplets             | Counts the number of droplets in a size class with a mean size of 3 micrometers that were present in the containing patch when the individual was infected.                                                                                                                                   |
| <i>droplets_size6AtInf</i>    | People, static | droplets             | Counts the number of droplets in a size class with a mean size of 6 micrometers that were present in the containing patch when the individual was infected.                                                                                                                                   |
| <i>droplets_size12AtInf</i>   | People, static | droplets             | Counts the number of droplets in a size class with a mean size of 12 micrometers that were present in the containing patch when the individual was infected.                                                                                                                                  |
| <i>droplets_size20AtInf</i>   | People, static | droplets             | Counts the number of droplets in a size class with a mean size of 20 micrometers that were present in the containing patch when the individual was infected.                                                                                                                                  |
| <i>droplets_size28AtInf</i>   | People, static | droplets             | Counts the number of droplets in a size class with a mean size of 28 micrometers that were present in the containing patch when the individual was infected.                                                                                                                                  |
| <i>droplets_size36AtInf</i>   | People, static | droplets             | Counts the number of droplets in a size class with a mean size of 36 micrometers that were present in the containing patch when the individual was infected.                                                                                                                                  |
| <i>droplets_size45AtInf</i>   | People, static | droplets             | Counts the number of droplets in a size class with a mean size of 45 micrometers that were present in the containing patch when the individual was infected.                                                                                                                                  |

|                                |                 |                          |                                                                                                                                                                                                                                                                                                                      |
|--------------------------------|-----------------|--------------------------|----------------------------------------------------------------------------------------------------------------------------------------------------------------------------------------------------------------------------------------------------------------------------------------------------------------------|
| <i>droplets_size62.5AtInf</i>  | People, static  | droplets                 | Counts the number of droplets in a size class with a mean size of 62.5 micrometers that were present in the containing patch when the individual was infected.                                                                                                                                                       |
| <i>droplets_size87.5AtInf</i>  | People, static  | droplets                 | Counts the number of droplets in a size class with a mean size of 87.5 micrometers that were present in the containing patch when the individual was infected.                                                                                                                                                       |
| <i>droplets_size112.5AtInf</i> | People, static  | droplets                 | Counts the number of droplets in a size class with a mean size of 112.5 micrometers that were present in the containing patch when the individual was infected.                                                                                                                                                      |
| <i>droplets_size137.5AtInf</i> | People, static  | droplets                 | Counts the number of droplets in a size class with a mean size of 137.5 micrometers that were present in the containing patch when the individual was infected.                                                                                                                                                      |
| <i>droplets_size175AtInf</i>   | People, static  | droplets                 | Counts the number of droplets in a size class with a mean size of 175 micrometers that were present in the containing patch when the individual was infected.                                                                                                                                                        |
| <i>droplets_size225AtInf</i>   | People, static  | droplets                 | Counts the number of droplets in a size class with a mean size of 225 micrometers that were present in the containing patch when the individual was infected.                                                                                                                                                        |
| <i>droplets_size375AtInf</i>   | People, static  | droplets                 | Counts the number of droplets in a size class with a mean size of 375 micrometers that were present in the containing patch when the individual was infected.                                                                                                                                                        |
| <i>droplets_size750AtInf</i>   | People, static  | droplets                 | Counts the number of droplets in a size class with a mean size of 750 micrometers that were present in the containing patch when the individual was infected.                                                                                                                                                        |
| <i>dropletDecay</i>            | Global, static  | % droplets removed / min | Droplet decay rate.                                                                                                                                                                                                                                                                                                  |
| <i>expectorateHeight</i>       | Global, static  | m                        | The height at which droplets are expelled. This is also the maximum vertical height of the simulated world, and the height used to in area volume calculations. (i.e., patch volumes are 1 m X 1 m X expectorateHeight m).                                                                                           |
| <i>expectorateRisk</i>         | Person, static  | -                        | Denotes proportion of droplets agents expel on any given timestep. Defaults to 1. Changes if people are wearing masks.                                                                                                                                                                                               |
| <i>exposureRisk</i>            | Person, static  | -                        | Denotes agents' probability of infection given exposure to infectious agents. Defaults to 1 (i.e., complete susceptibility).                                                                                                                                                                                         |
| <i>face-northward</i>          | Global, static  | -                        | Logical variable that controls whether people only look northward within a range of 90 degrees (if TRUE) or face a random direction (if FALSE).                                                                                                                                                                      |
| <i>firstInfectTime</i>         | Global, dynamic | ticks                    | Records the tick at which the first transmission event occurs.                                                                                                                                                                                                                                                       |
| <i>grid-height</i>             | Global, static  | m                        | The number of rows present in the grid representing the room in which agents interact. Note: cells in the matrix (i.e., patches), regardless of how many there are, represent 1 m X 1 m areas.                                                                                                                       |
| <i>grid-width</i>              | Global, static  | m                        | The number of columns present in the grid representing the room in which agents interact. Note: cells in the matrix (i.e., patches), regardless of how many there are, represent 1 m X 1 m areas.                                                                                                                    |
| <i>infected?</i>               | Person, dynamic | -                        | Logical variable describing if people have been infected by contaminated patches.                                                                                                                                                                                                                                    |
| <i>infectious?</i>             | Person, static  | -                        | Logical variable describing if people can spread the pathogen.                                                                                                                                                                                                                                                       |
| <i>lastInfectTime</i>          | Global, dynamic | ticks                    | Records the tick at which the last susceptible individual was infected. Only relevant if ALL susceptible people were infected.                                                                                                                                                                                       |
| <i>mod_group</i>               | Global, static  | -                        | Controls what agent variables are modified by risk mod. Takes the values "sus," "inf," or "sus_inf" (representing susceptible agents only, infectious agents only, or both). If "sus," only exposureRisk is adjusted. If "inf," only expectorateRisk is adjusted. If "sus_inf," both of these variables are updated. |
| <i>mod-proportion</i>          | Global, static  | -                        | Describes the probability that susceptible individuals will have their infection probability modified by the maskRisk-mod parameter. This parameter is used to vary the proportion of individuals minimizing their disease risk in the population (e.g., through the use of PPE).                                    |
| <i>n</i>                       | Global, static  | people                   | The total number of (i.e., both "healthy" and "infectious") people turtles that spawn in each cohort.                                                                                                                                                                                                                |
| <i>n_infectious</i>            | Global, static  | people                   | The number of infectious people turtles that spawn in each cohort. This is a subset of n, not additional turtles. Infectious people default to "asymptomatic" status.                                                                                                                                                |
| <i>num_asymptomatic</i>        | Global, dynamic | people                   | The number of asymptomatic "infectious" people that spawn in the first cohort. The probability of an infectious agent being asymptomatic is $(n\_infectious * (1 - symp-pr))$ .                                                                                                                                      |

|                                  |                 |          |                                                                                                                                                                                                                                                                                                                                                               |
|----------------------------------|-----------------|----------|---------------------------------------------------------------------------------------------------------------------------------------------------------------------------------------------------------------------------------------------------------------------------------------------------------------------------------------------------------------|
| <i>num_symptomatic</i>           | Global, dynamic | people   | The number of symptomatic "infectious" people that spawn in the first cohort. The probability of an infectious agent being symptomatic is ( $n_{infectious} * symp-pr$ ).                                                                                                                                                                                     |
| <i>num_completelySusceptible</i> | Global, dynamic | people   | Counts the number of individuals in a cohort that are completely susceptible to infection.                                                                                                                                                                                                                                                                    |
| <i>num_reducedSusceptible</i>    | Global, dynamic | people   | Counts the number of individuals in a cohort with reduced susceptibility to infection.                                                                                                                                                                                                                                                                        |
| <i>numCohorts</i>                | Global, static  | cohorts  | The number of people cohorts observed during the simulation. Note: all cohorts interact with the same grid (i.e., world), but do not exist in the world at the same time.                                                                                                                                                                                     |
| <i>numReturnVents</i>            | Global, static  | vents    | The number of patches designated as return vents. Cannot exceed grid-width value if ventilReturnWall is one of "north," "south," "up," or "down." Cannot exceed grid-height value if ventilReturnWall is one of "east," "west," "left," or "right."                                                                                                           |
| <i>numSupplyVents</i>            | Global, static  | vents    | The number of patches designated as supply vents. Cannot exceed grid-width value if ventilSupplyWall is one of "north," "south," "up," or "down." Cannot exceed grid-height value if ventilReturnWall is one of "east," "west," "left," or "right."                                                                                                           |
| <i>patchContamination.list</i>   | Global, dynamic | -        | List of the number of contaminated patches present at each time step.                                                                                                                                                                                                                                                                                         |
| <i>patchInfectiousness.list</i>  | Global, dynamic | -        | List of the mean patch infectiousness values observed throughout the simulation.                                                                                                                                                                                                                                                                              |
| <i>person-count</i>              | Patch, dynamic  | people   | Counts the number of people in the cell.                                                                                                                                                                                                                                                                                                                      |
| <i>personDist.list</i>           | Global, dynamic | -        | List of average distance between people at each tick.                                                                                                                                                                                                                                                                                                         |
| <i>personPerPatch-cap</i>        | Global, static  | people   | The maximum number of people that may possibly exist within a single patch.                                                                                                                                                                                                                                                                                   |
| <i>mask?</i>                     | Person, static  | -        | Logical variable describing if people are wearing a mask.                                                                                                                                                                                                                                                                                                     |
| <i>maskRisk-mod</i>              | Global, static  | -        | The probability that people exposed to virions will be infected after spending 1-tick duration in a contaminated patch when a mask, or that infectious individuals expectorate infectious droplets when wearing the same masks.                                                                                                                               |
| <i>rearrange-cohort</i>          | Global, static  | -        | Logical variable describing whether or not the cohort-replace effectively becomes a rough proxy for movement of people within the room. If TRUE, the first "cohort" never leaves the room, rather, they are re-distributed according to the social-distance and personPerPatch-cap values set.                                                                |
| <i>returnVent</i>                | Patch, static   | -        | Denotes if patch is a return vent.                                                                                                                                                                                                                                                                                                                            |
| <i>showArrows</i>                | Global, static  | -        | Logical variable controlling if airArrow turtles will be hidden or not. If TRUE, airArrows will be visible. If FALSE, they will be hidden.                                                                                                                                                                                                                    |
| <i>social-distance</i>           | Global, static  | m        | The interpersonal distance that people seek to maintain over the course of the simulation.                                                                                                                                                                                                                                                                    |
| <i>speak_airflow-angle</i>       | Global, static  | degrees  | The angle of airflow associated with breathing events. Affects the spread of droplets during a given droplet-expulsion event from asymptomatic individuals.                                                                                                                                                                                                   |
| <i>speak_spread-dist.mean</i>    | Global, static  | m        | The mean distance from asymptomatic infectious people that droplets may be spread when breathing. This value will be used to generate a lognormal distribution from which droplet-expulsion-spread distance will be randomly drawn when an asymptomatic agent triggers a droplet-expulsion event.                                                             |
| <i>speak_spread-dist.sd</i>      | Global, static  | m        | The standard deviation distance, given an speak_spread-dist.mean value, from asymptomatic infectious people that droplets may be spread when breathing. This value will be used to generate a lognormal distribution from which droplet-expulsion-spread distance will be randomly drawn when an asymptomatic agent triggers a droplet-expulsion event.       |
| <i>supplyVent</i>                | Patch, static   | -        | Denotes if patch is a supply vent.                                                                                                                                                                                                                                                                                                                            |
| <i>symp-pr</i>                   | Global, static  | -        | Probability that infectious people will be "symptomatic," instead of having the default "asymptomatic" status.                                                                                                                                                                                                                                                |
| <i>symptomatic?</i>              | Person, static  | -        | Logical variable describing if people are coughing to spread the contagion. If TRUE, spread will be dictated by cough_airflow-angle, cough_spread-dist.mean, and cough_spread-dist.sd parameter values. If FALSE, but infectious? is TRUE, spread will be dictated by speak_airflow-angle, speak_spread-dist.mean, and speak_spread-dist.sd parameter values. |
| <i>totalDroplets</i>             | Patch, dynamic  | droplets | Counts the total number of droplets present in the patch.                                                                                                                                                                                                                                                                                                     |

|                            |                 |                      |                                                                                                                                                                            |
|----------------------------|-----------------|----------------------|----------------------------------------------------------------------------------------------------------------------------------------------------------------------------|
| <i>totalInfected</i>       | Global, dynamic | people               | Running sum of the total number of infected people over the course of the simulation.                                                                                      |
| <i>totalInfected.list</i>  | Global, dynamic | -                    | List of the total number of infected people at each tick.                                                                                                                  |
| <i>transmissionRisk</i>    | Patch, dynamic  | -                    | Tracks the probability that susceptible people on the patch will be infected on a given time point. This is the product of <i>virionCount</i> and <i>virionRisk</i> .      |
| <i>ventilation</i>         | Global, static  | -                    | Logical variable describing if airflow will move droplets throughout patches during the simulation.                                                                        |
| <i>ventil_movementRate</i> | Global, static  | % air change / min   | Describes the rate at which air (and therefore droplets suspended in the air) will move to another patch at each tick if ventilation effects are being simulated.          |
| <i>ventil_removalRate</i>  | Global, static  | -                    | Describes the proportion of droplets on return vent patch(es) that will be removed from the simulation due to filtration.                                                  |
| <i>ventilReturnWall</i>    | Global, static  | -                    | Takes one value "north," "south," "east," "west," OR "up," "down," "right," "left." Describes the wall of the simulated world that return vents will be located on.        |
| <i>ventilSupplyWall</i>    | Global, static  | -                    | Takes one value "north," "south," "east," "west," OR "up," "down," "right," "left." Describes the wall of the simulated world that supply vents will be located on.        |
| <i>virionCount</i>         | Patch, dynamic  | virions              | Counts the number of virions in the patch on a given time step.                                                                                                            |
| <i>virionRisk</i>          | Global, static  | -                    | The risk of infection given exposure to a single virion.                                                                                                                   |
| <i>virionsPerML</i>        | Global, static  | virions / mL         | Number of virions per mL of droplet fluid.                                                                                                                                 |
| <i>vol_B</i>               | Global, static  | m <sup>3</sup> / min | The rate of air inhaled by individuals in patches.                                                                                                                         |
| <i>Vt_diam3</i>            | Global, static  | m / min              | The terminal velocity of a respiratory droplet with a 3-micrometer diameter, calculated from equations given by <a href="#">AnchorDopqui &amp; Chudnovsky (2020)</a> .     |
| <i>Vt_diam6</i>            | Global, static  | m / min              | The terminal velocity of a respiratory droplet with a 6-micrometer diameter, calculated from equations given by <a href="#">AnchorDopqui &amp; Chudnovsky (2020)</a> .     |
| <i>Vt_diam12</i>           | Global, static  | m / min              | The terminal velocity of a respiratory droplet with a 12-micrometer diameter, calculated from equations given by <a href="#">AnchorDopqui &amp; Chudnovsky (2020)</a> .    |
| <i>Vt_diam20</i>           | Global, static  | m / min              | The terminal velocity of a respiratory droplet with a 20-micrometer diameter, calculated from equations given by <a href="#">AnchorDopqui &amp; Chudnovsky (2020)</a> .    |
| <i>Vt_diam28</i>           | Global, static  | m / min              | The terminal velocity of a respiratory droplet with a 28-micrometer diameter, calculated from equations given by <a href="#">AnchorDopqui &amp; Chudnovsky (2020)</a> .    |
| <i>Vt_diam36</i>           | Global, static  | m / min              | The terminal velocity of a respiratory droplet with a 36-micrometer diameter, calculated from equations given by <a href="#">AnchorDopqui &amp; Chudnovsky (2020)</a> .    |
| <i>Vt_diam45</i>           | Global, static  | m / min              | The terminal velocity of a respiratory droplet with a 45-micrometer diameter, calculated from equations given by <a href="#">AnchorDopqui &amp; Chudnovsky (2020)</a> .    |
| <i>Vt_diam62.5</i>         | Global, static  | m / min              | The terminal velocity of a respiratory droplet with a 62.5-micrometer diameter, calculated from equations given by <a href="#">AnchorDopqui &amp; Chudnovsky (2020)</a> .  |
| <i>Vt_diam87.5</i>         | Global, static  | m / min              | The terminal velocity of a respiratory droplet with a 87.5-micrometer diameter, calculated from equations given by <a href="#">AnchorDopqui &amp; Chudnovsky (2020)</a> .  |
| <i>Vt_diam112.5</i>        | Global, static  | m / min              | The terminal velocity of a respiratory droplet with a 112.5-micrometer diameter, calculated from equations given by <a href="#">AnchorDopqui &amp; Chudnovsky (2020)</a> . |
| <i>Vt_diam137.5</i>        | Global, static  | m / min              | The terminal velocity of a respiratory droplet with a 137.5-micrometer diameter, calculated from equations given by <a href="#">AnchorDopqui &amp; Chudnovsky (2020)</a> . |
| <i>Vt_diam175</i>          | Global, static  | m / min              | The terminal velocity of a respiratory droplet with a 175-micrometer diameter, calculated from equations given by <a href="#">AnchorDopqui &amp; Chudnovsky (2020)</a> .   |
| <i>Vt_diam225</i>          | Global, static  | m / min              | The terminal velocity of a respiratory droplet with a 225-micrometer diameter, calculated from equations given by <a href="#">AnchorDopqui &amp; Chudnovsky (2020)</a> .   |
| <i>Vt_diam375</i>          | Global, static  | m / min              | The terminal velocity of a respiratory droplet with a 375-micrometer diameter, calculated from equations given by <a href="#">AnchorDopqui &amp; Chudnovsky (2020)</a> .   |
| <i>Vt_diam750</i>          | Global, static  | m / min              | The terminal velocity of a respiratory droplet with a 750-micrometer diameter, calculated from equations given by <a href="#">AnchorDopqui &amp; Chudnovsky (2020)</a> .   |

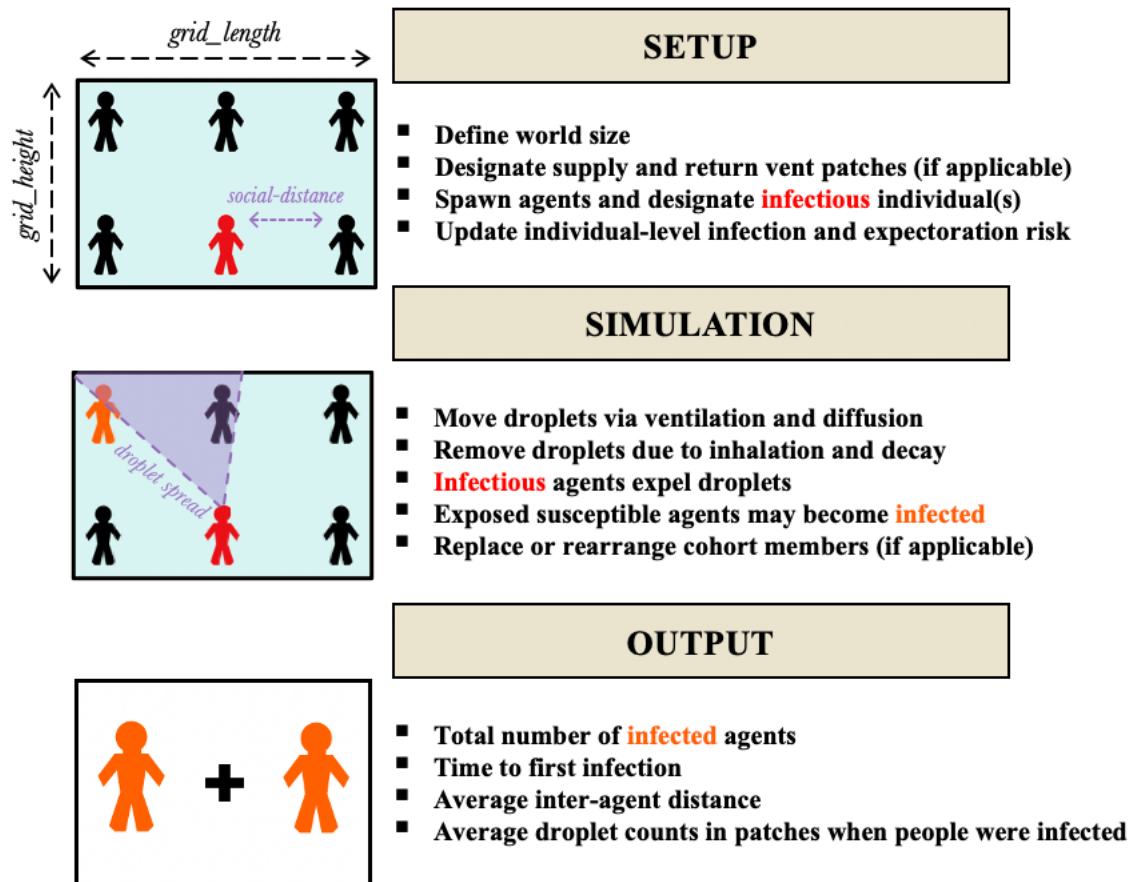

352

353 Figure S1-1. Simplified model overview. Bulleted sub-models are listed in the order that they  
 354 take place within the model. Simulation bullet points repeat each model tick.

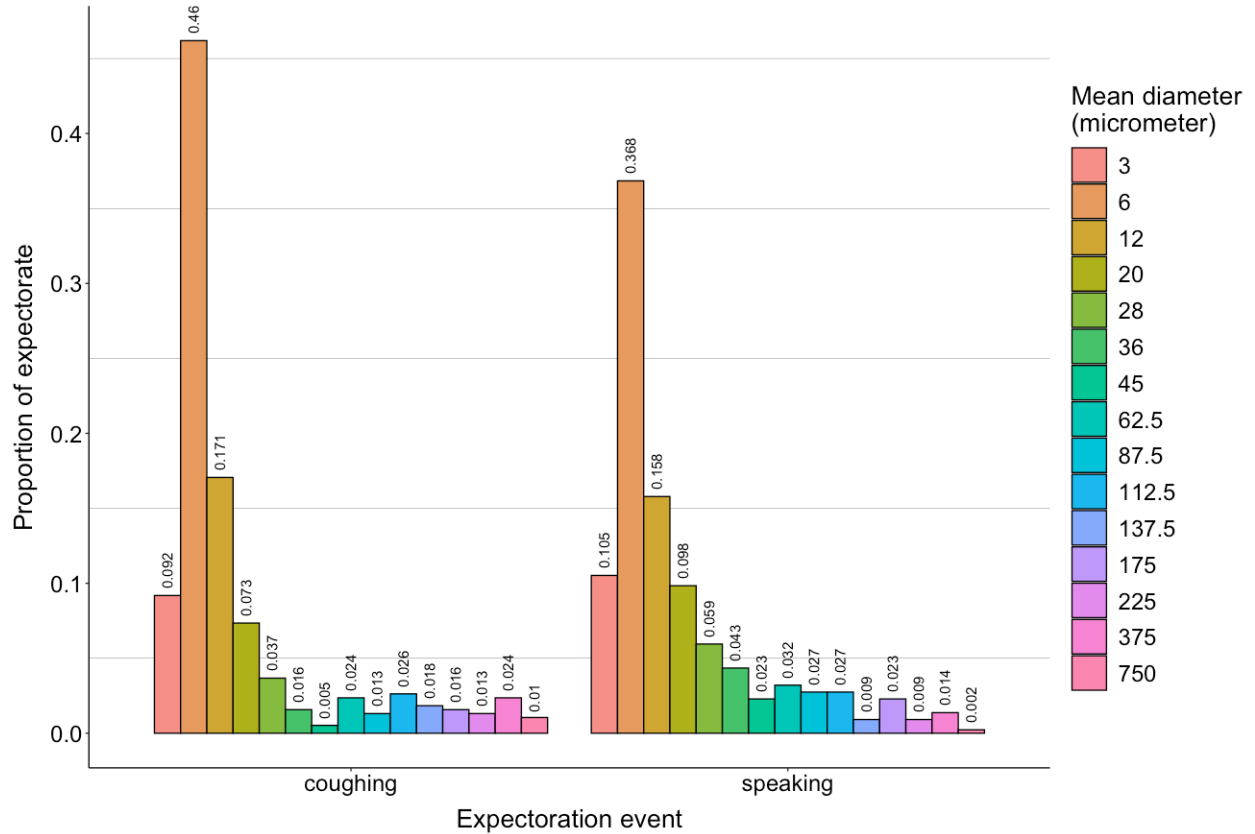

355

356 Figure S1-2. Distribution of droplet sizes during expectoration events. Distributions of size  
 357 classes during coughing and speaking events are based on findings of Chao *et al.* (2009), and  
 358 represent mean observed droplet-size measurements they recorded 60 mm away from  
 359 individuals' mouths immediately following these activities.

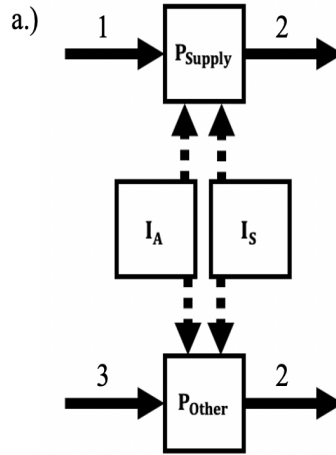

b.)

| Number | Equation                                                                                                                                                                                                                                                                                                                       | Description                               |
|--------|--------------------------------------------------------------------------------------------------------------------------------------------------------------------------------------------------------------------------------------------------------------------------------------------------------------------------------|-------------------------------------------|
| 1      | $\frac{(\sum_{d=1}^D \text{num}_{d,r} \cdot \text{ventil\_movementRate} \cdot (1 - \text{ventil\_removalRate}))}{P_{\text{Supply}}} + \sum_{n=1}^{\text{Neighbors}} \left( \sum_{d=1}^D (\text{num}_{d,n} \cdot (\text{ventil\_movementRate} + \text{diffusionRate})) \right)$                                                 | Fixed droplet input to supply patches     |
| 2      | $\sum_{d=1}^D \left( \left( \frac{\text{vol}_p}{1 \text{ m} \cdot 1 \text{ m} \cdot \text{expectorateHeight}} \cdot \text{People}_p \right) + \left( \frac{V_{\text{inhalation}}}{\text{expectorateHeight}} \right) + \text{dropletDecay} + \text{ventil\_movementRate} + \text{diffusionRate} \right) \cdot \text{num}_{d,p}$ | Droplet removal from patches              |
| 3      | $\sum_{n=1}^{\text{Neighbors}} \left( \sum_{d=1}^D (\text{num}_{d,n} \cdot (\text{ventil\_movementRate} + \text{diffusionRate})) \right)$                                                                                                                                                                                      | Fixed droplet input to non-supply patches |

360  
361

362 Figure S1-3. Droplet dynamics for supply-vent and non-supply-vent patches. a.) When modeling  
363 ventilation, droplet input to and removal from patches are functions of fixed rates (solid arrows)  
364 and probabilistic expectoration from symptomatic and asymptomatic people within range  
365 (dashed arrows). b.) Equations for fixed effects on within-patch droplet dynamics. Supply  
366 patches receive input from Return-vent patches in addition to diffusion from nearby neighbors.  
367 Non-supply-vent patches do not receive input from Return vents. Droplet output is a function of  
368 ventilation airflow parameters, diffusion to neighbors, a fixed decay rate, and inhalation by  
369 people within the patch.
